# Supplementary material for: Examining the reactivity of tris(ortho-carboranyl)borane with Lewis bases and application in frustrated Lewis pair Si–H bond cleavage
Source: Royal Society of Chemistry journal article supplement (doi:10.1039/d3dt01557b), 2023-01-01
Supplement: d3dt01557b1.pdf [file d3dt01557b1.pdf]

## Supporting Information for:

# Examining the Reactivity of Tris(*ortho*-carboranyl)borane with Lewis Bases and Application in Frustrated Lewis Pair Si-H Bond Cleavage

*Kanika Vashisth, Sanjay Dutta, Manjur O. Akram and Caleb D. Martin*

Baylor University, Department of Chemistry and Biochemistry, One Bear Place #97348, Waco, TX 76798.

# Table of Contents

|                                      |     |
|--------------------------------------|-----|
| NMR and IR spectra .....             | S3  |
| X-ray Crystallographic details ..... | S54 |

## NMR and IR spectra:

Figure S-1: Stacked  $^1\text{H}$  NMR (400 MHz) spectra of  $\text{EtOAc}\cdot\text{BoCb}_3$  with varying concentration (5, 10, 20, 50, and 100 equivalents) of EtOAc in  $\text{CDCl}_3$  (\*corresponds to the diagnostic C-H resonance on the *ortho*-carbon).

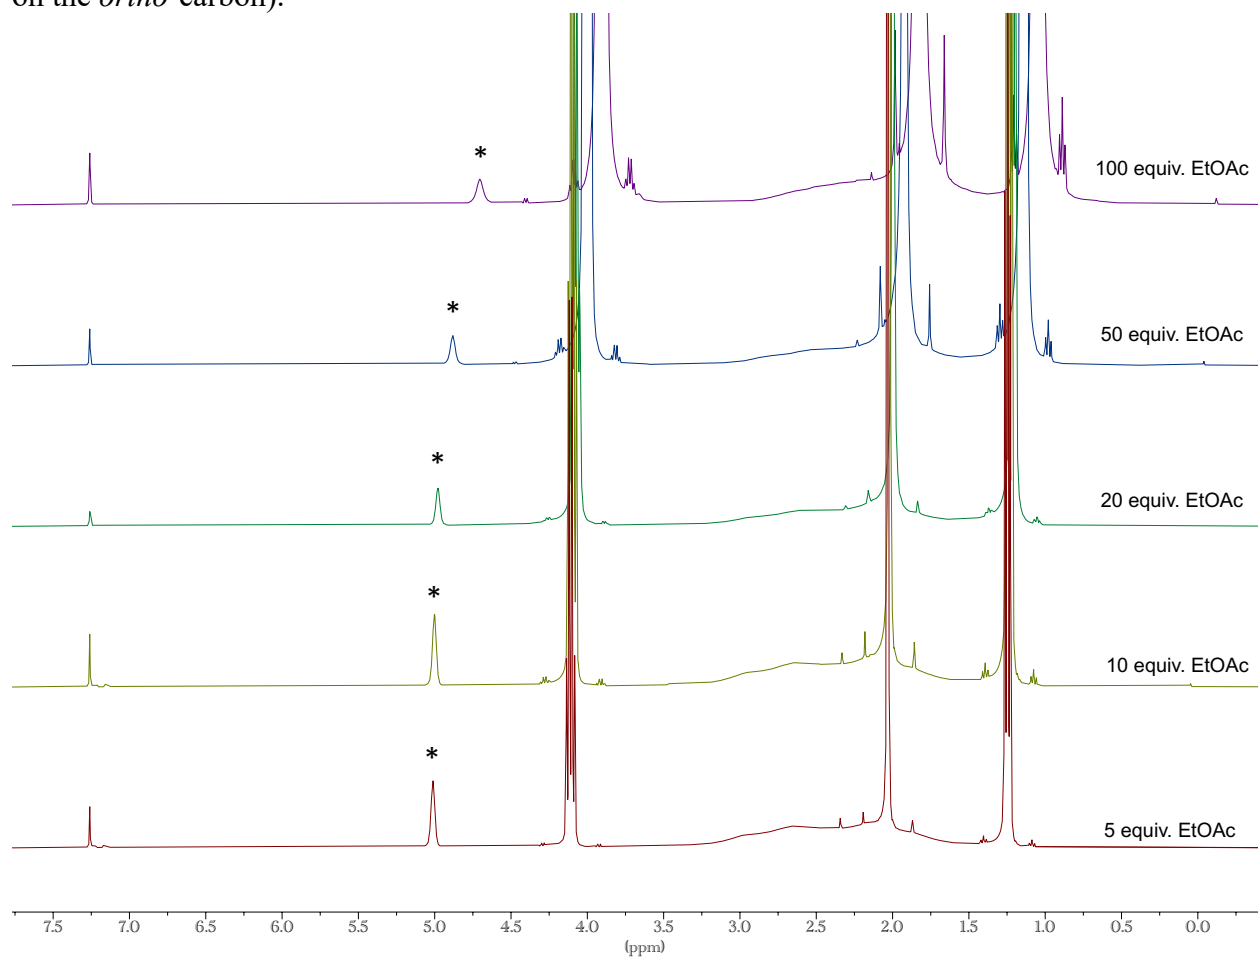

Figure S-2: Stacked  $^{11}\text{B}$  NMR (128 MHz) spectra of  $\text{EtOAc}\cdot\text{BoCb}_3$  with varying concentration (5, 10, 20, 50, and 100 equivalents) of EtOAc in  $\text{CDCl}_3$ .

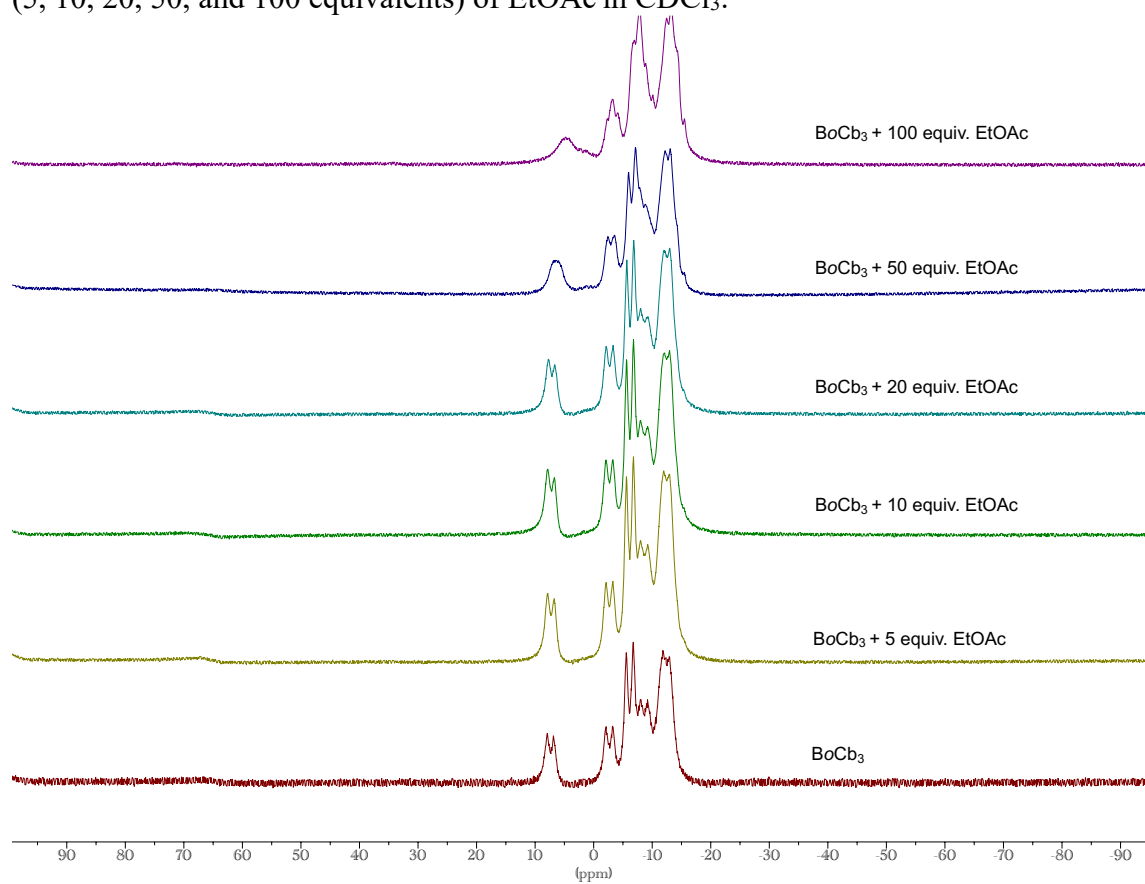

Figure S-3:  $^1\text{H}$  NMR (400 MHz) spectrum of  $2,6\text{-(CH}_3)_2\text{C}_6\text{H}_3\text{NC}\cdot\text{B}o\text{Cb}_3$  in  $\text{CDCl}_3$ .

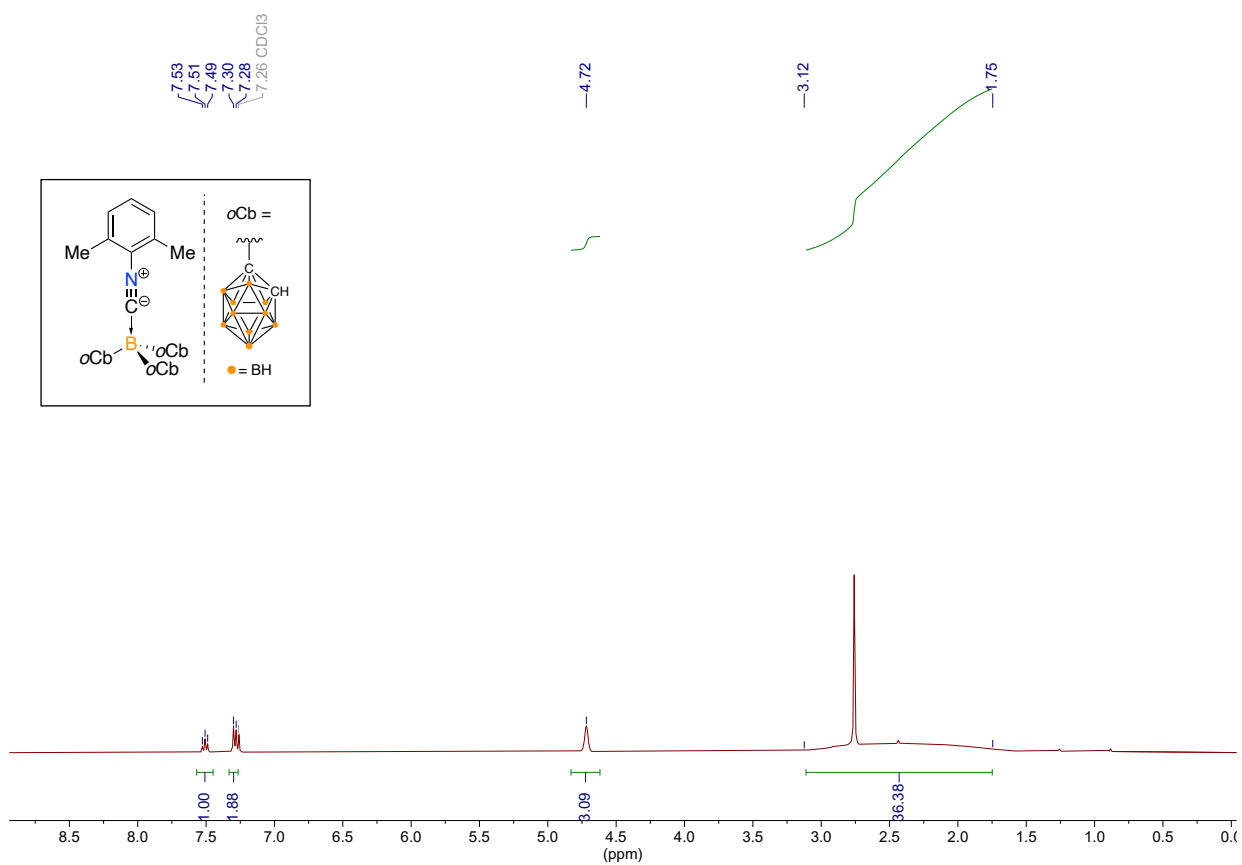

Figure S-4:  $^{13}\text{C}\{^1\text{H}\}$  NMR (101 MHz) spectrum of  $2,6\text{-(CH}_3)_2\text{C}_6\text{H}_3\text{NC}\cdot\text{B}(\text{oCb})_3$  in  $\text{CDCl}_3$ .

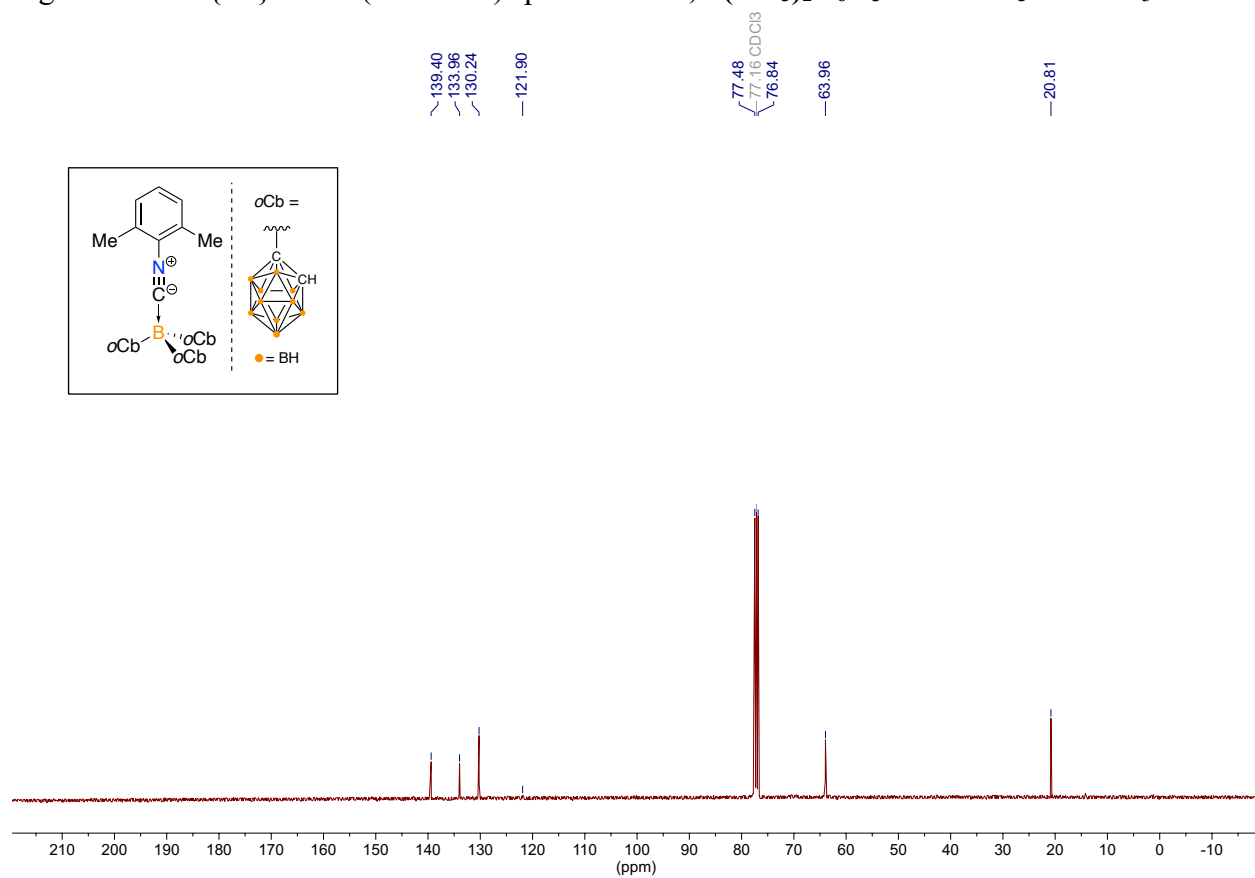

Figure S-5:  $^{11}\text{B}\{^1\text{H}\}$  NMR (128 MHz) spectrum of  $2,6\text{-(CH}_3)_2\text{C}_6\text{H}_3\text{NC}\cdot\text{B}(\text{oCb})_3$  in  $\text{CDCl}_3$ .

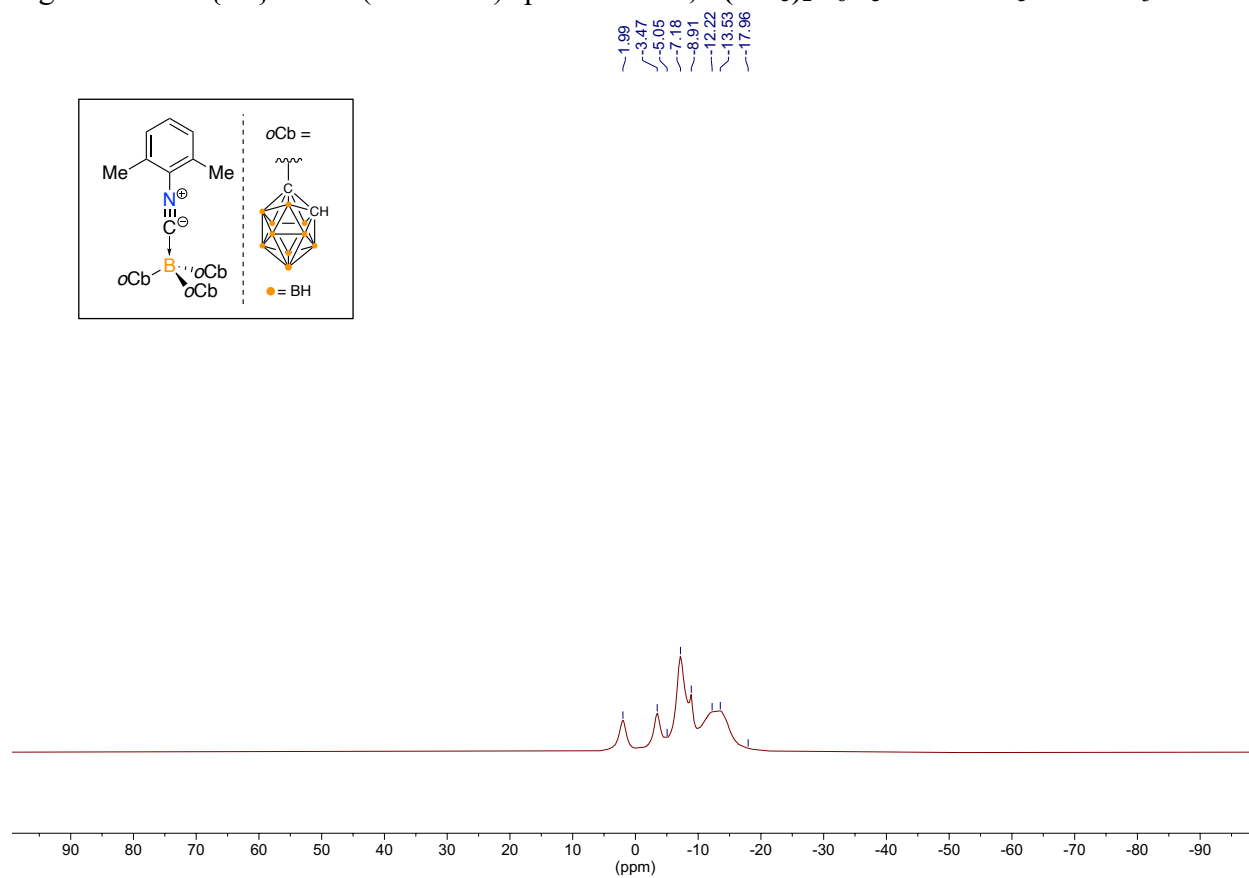

Figure S-6:  $^{11}\text{B}$  NMR (128 MHz) spectrum of  $2,6\text{-(CH}_3)_2\text{C}_6\text{H}_3\text{NC}\cdot\text{B}(\text{oCb})_3$  in  $\text{CDCl}_3$ .

2.40  
1.44  
-2.98  
-4.06  
-5.05  
-6.78  
-7.66  
-8.91  
-12.78  
-19.89

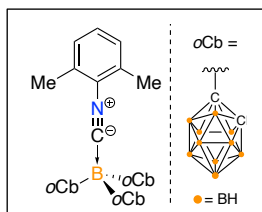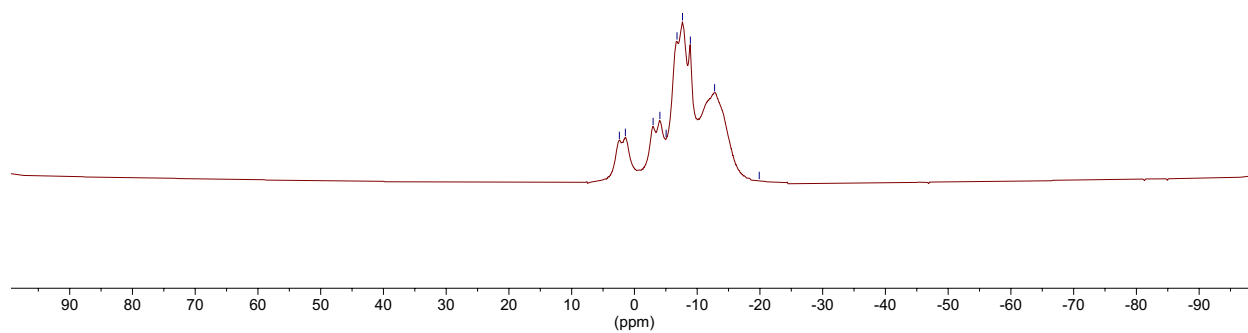



Figure S-7: FT-IR spectrum of **2,6-(CH<sub>3</sub>)<sub>2</sub>C<sub>6</sub>H<sub>3</sub>NC·B<sub>10</sub>Cb<sub>3</sub>**.

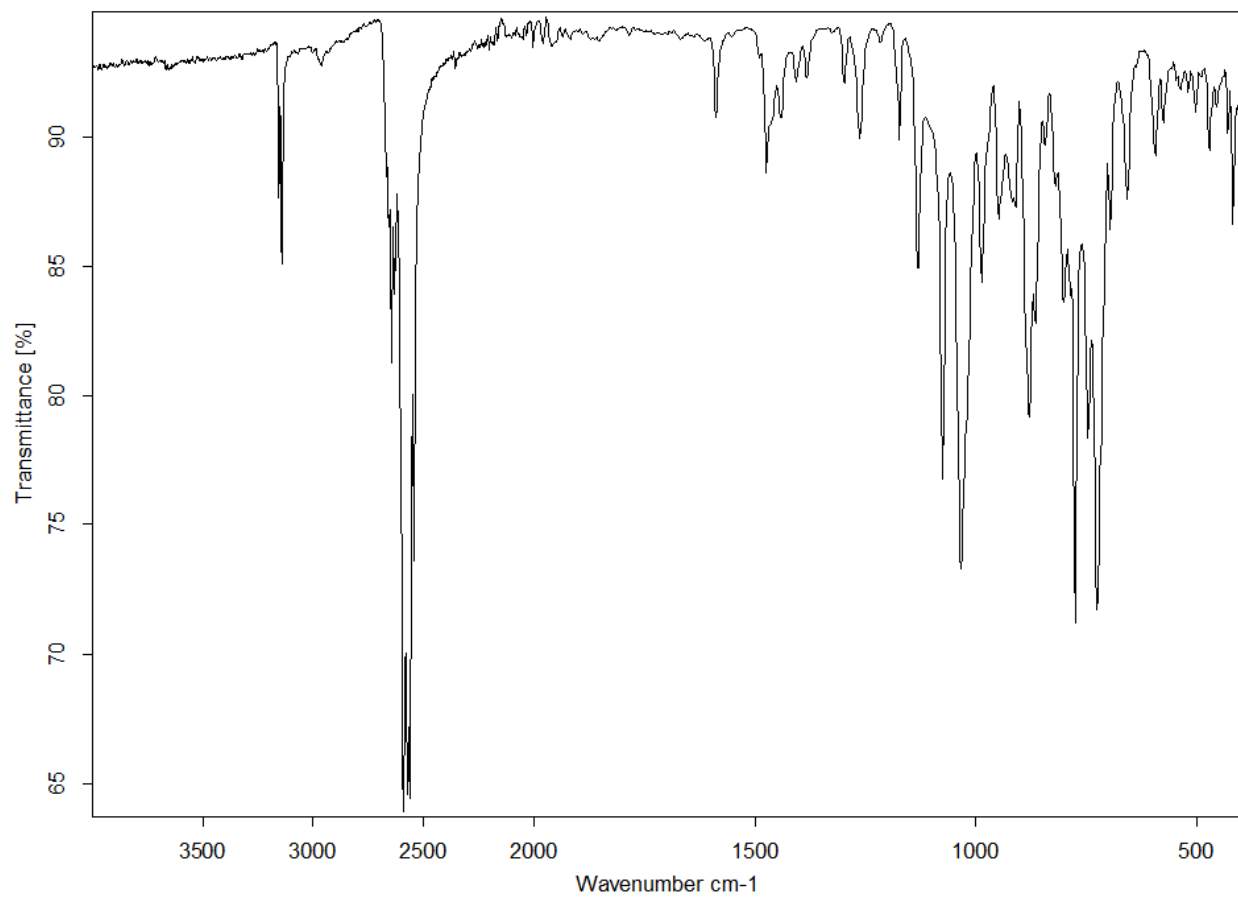

Figure S-8:  $^1\text{H}$  NMR (400 MHz) spectrum of  $[\text{Me}_3\text{PSiEt}_3][\text{HB}\sigma\text{Cb}_3]$  in  $\text{CDCl}_3$  (\* residual benzene).

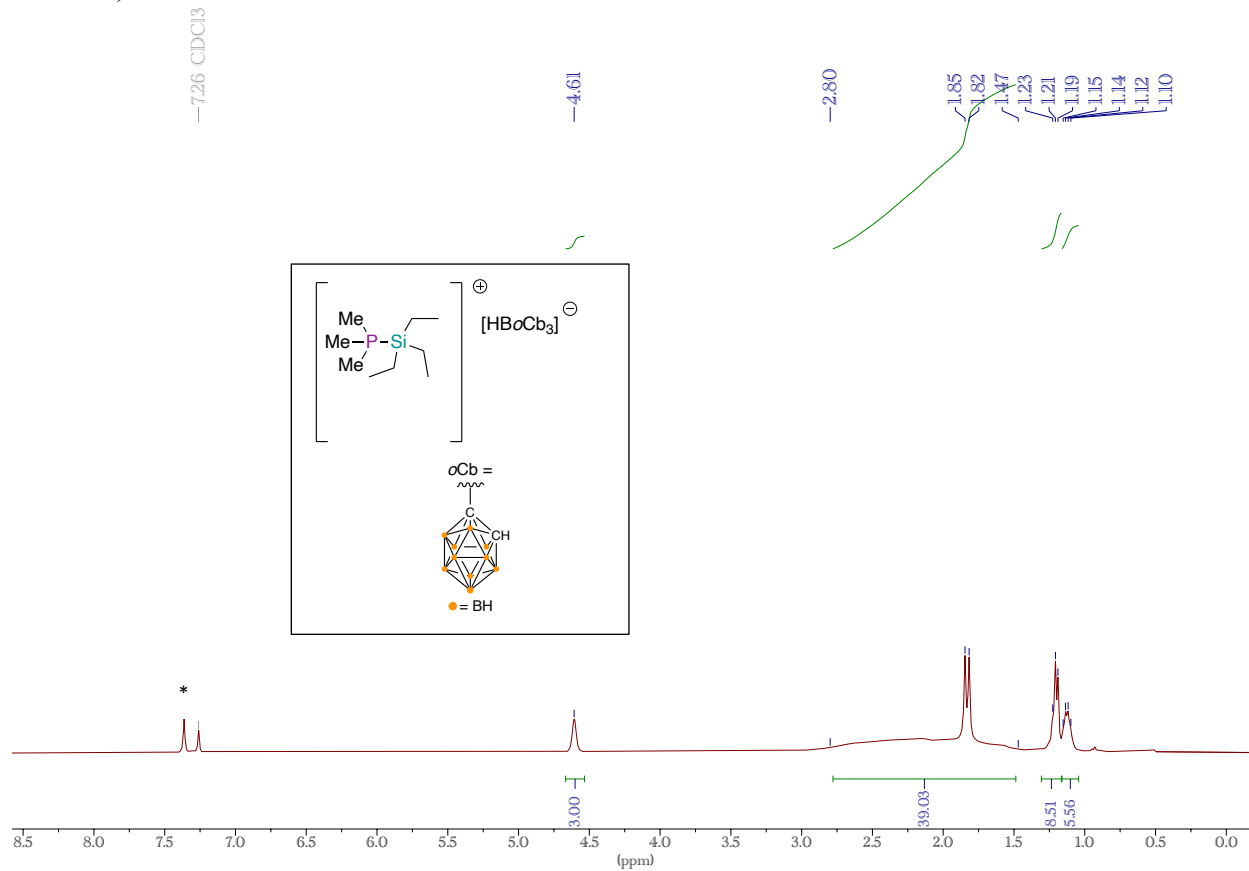

Figure S-9:  $^{13}\text{C}\{^1\text{H}\}$  NMR (101 MHz) spectrum of  $[\text{Me}_3\text{PSiEt}_3][\text{HB}o\text{Cb}_3]$  in  $\text{CDCl}_3$  (\* residual benzene).

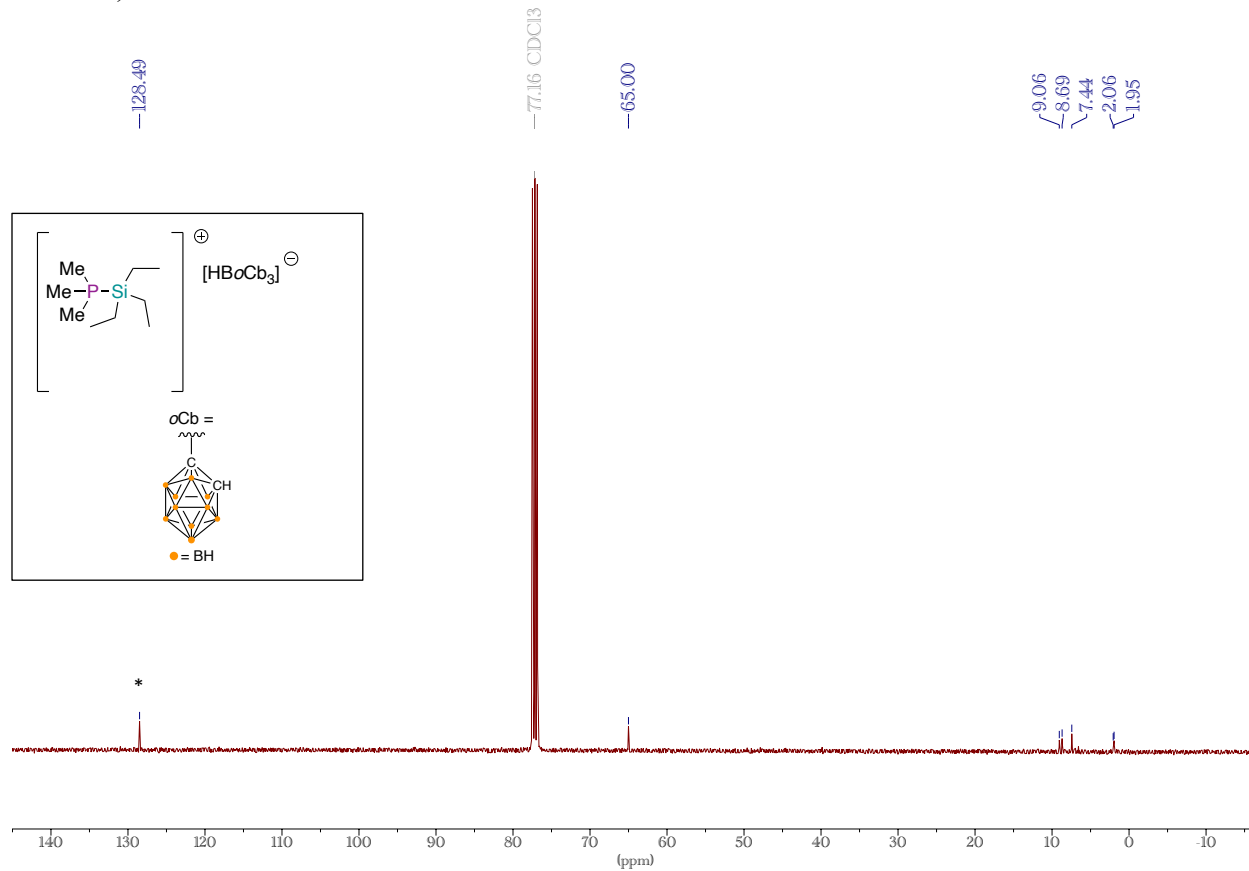

Figure S-10:  $^{11}\text{B}\{^1\text{H}\}$  NMR (128 MHz) spectrum of  $[\text{Me}_3\text{PSiEt}_3][\text{HB}o\text{Cb}_3]$  in  $\text{CDCl}_3$ .

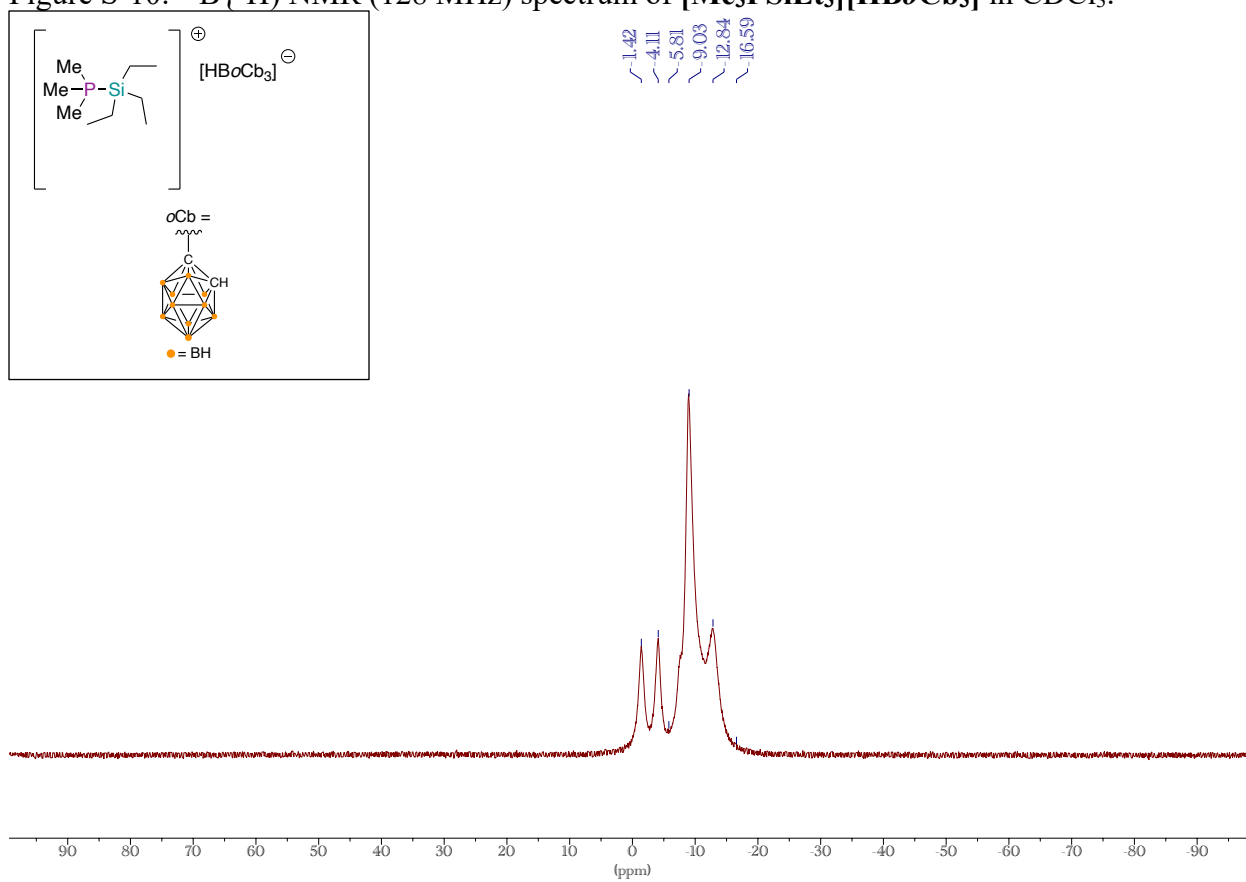

Figure S-11:  $^{11}\text{B}$  NMR (128 MHz) spectrum of  $[\text{Me}_3\text{PSiEt}_3][\text{HB}\sigma\text{Cb}_3]$  in  $\text{CDCl}_3$ .

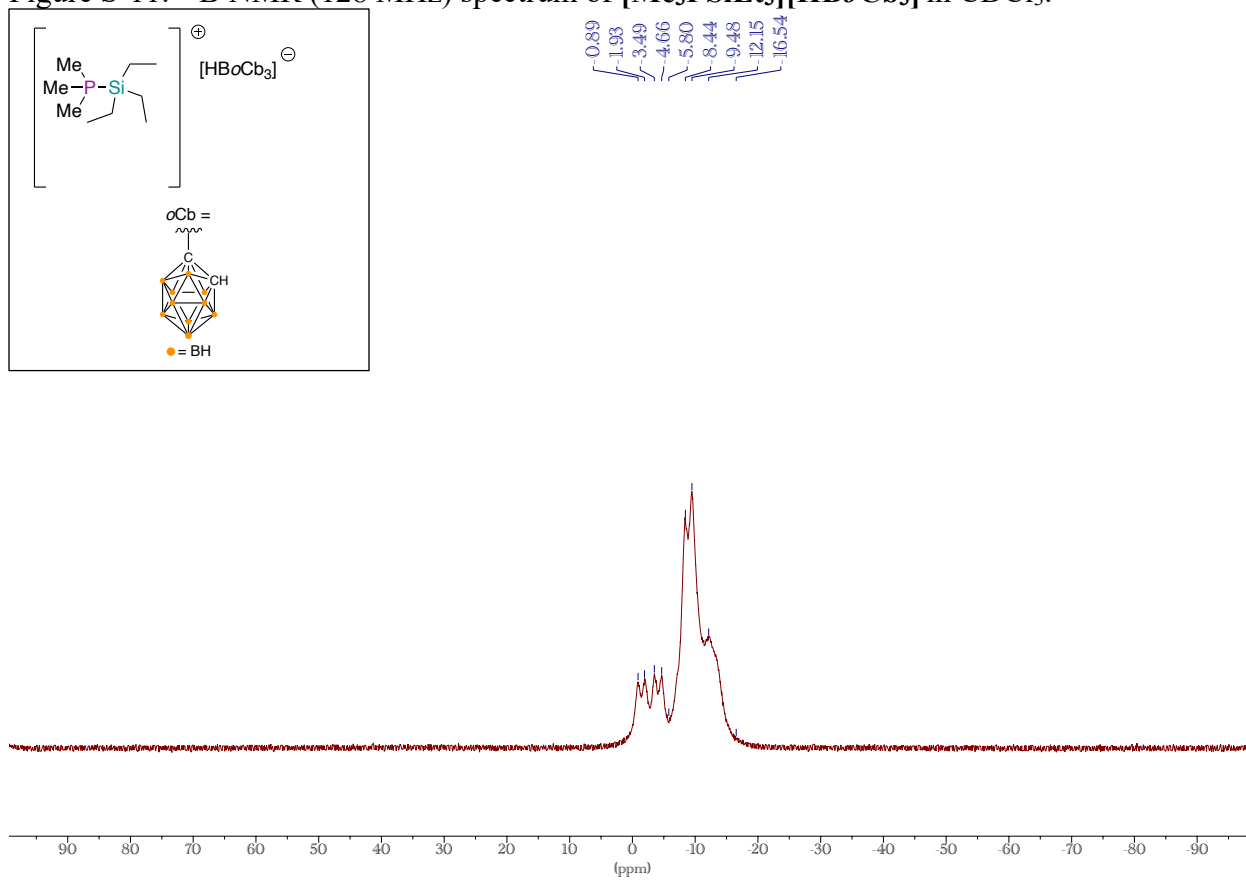

Figure S-12:  $^{31}\text{P}\{^1\text{H}\}$  NMR (162 MHz) spectrum of  $[\text{Me}_3\text{PSiEt}_3][\text{HB}o\text{Cb}_3]$  in  $\text{CDCl}_3$ .

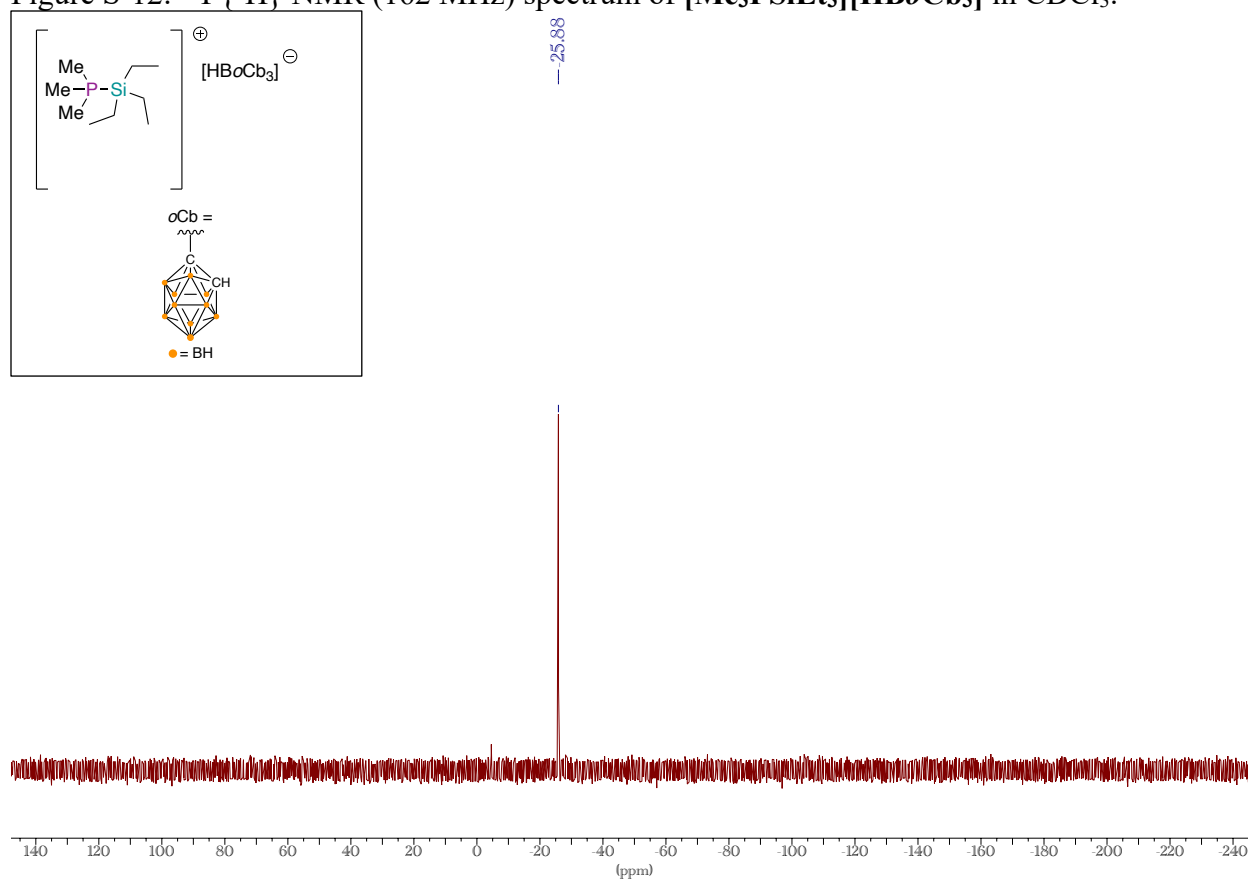

Figure S-13:  $^1\text{H}$  NMR (400 MHz) spectrum of  $[\text{Ph}_3\text{PSiEt}_3][\text{HB}o\text{Cb}_3]$  in  $\text{CDCl}_3$  (\* residual benzene).

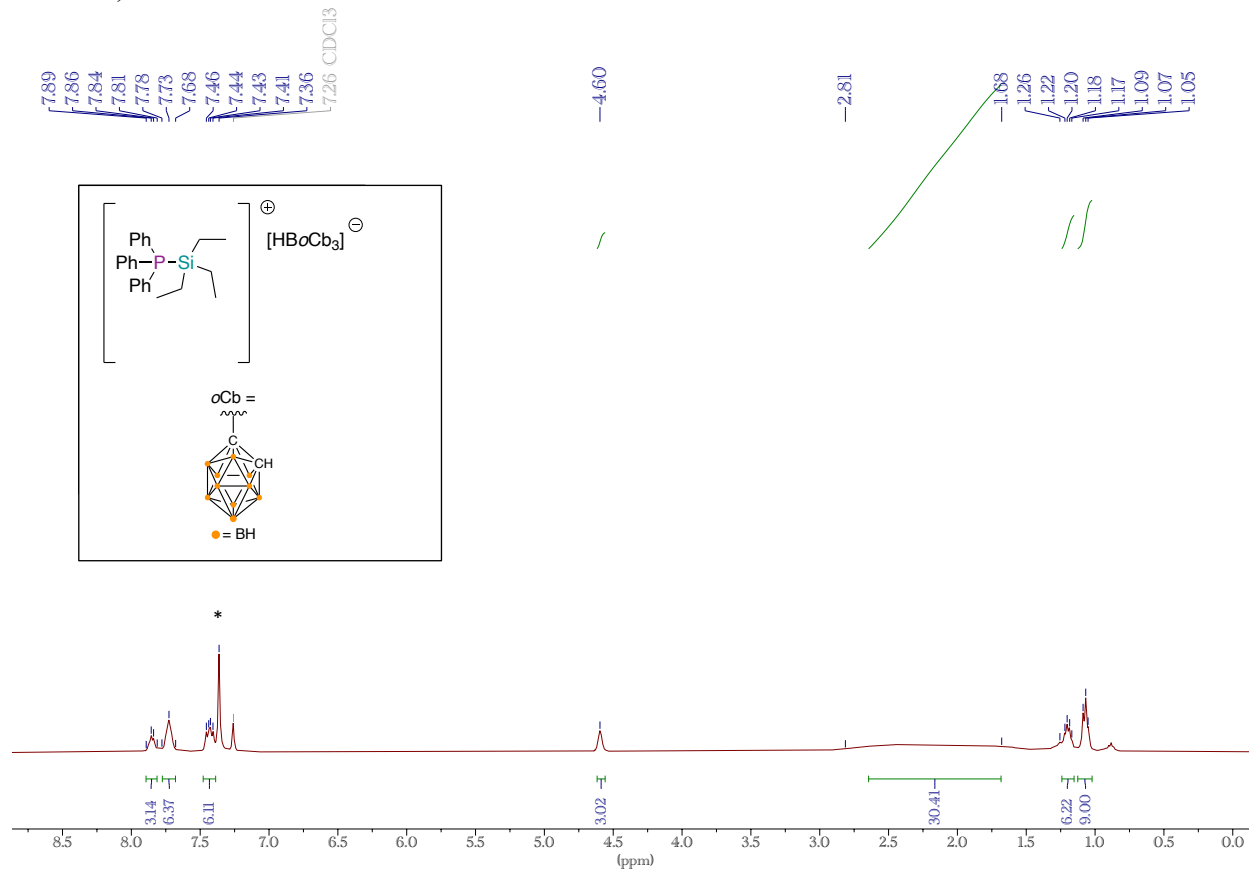

Figure S-14:  $^{13}\text{C}\{^1\text{H}\}$  NMR (101 MHz) spectrum of  $[\text{Ph}_3\text{PSiEt}_3][\text{HB}\sigma\text{Cb}_3]$  in  $\text{CDCl}_3$  (\* residual benzene).

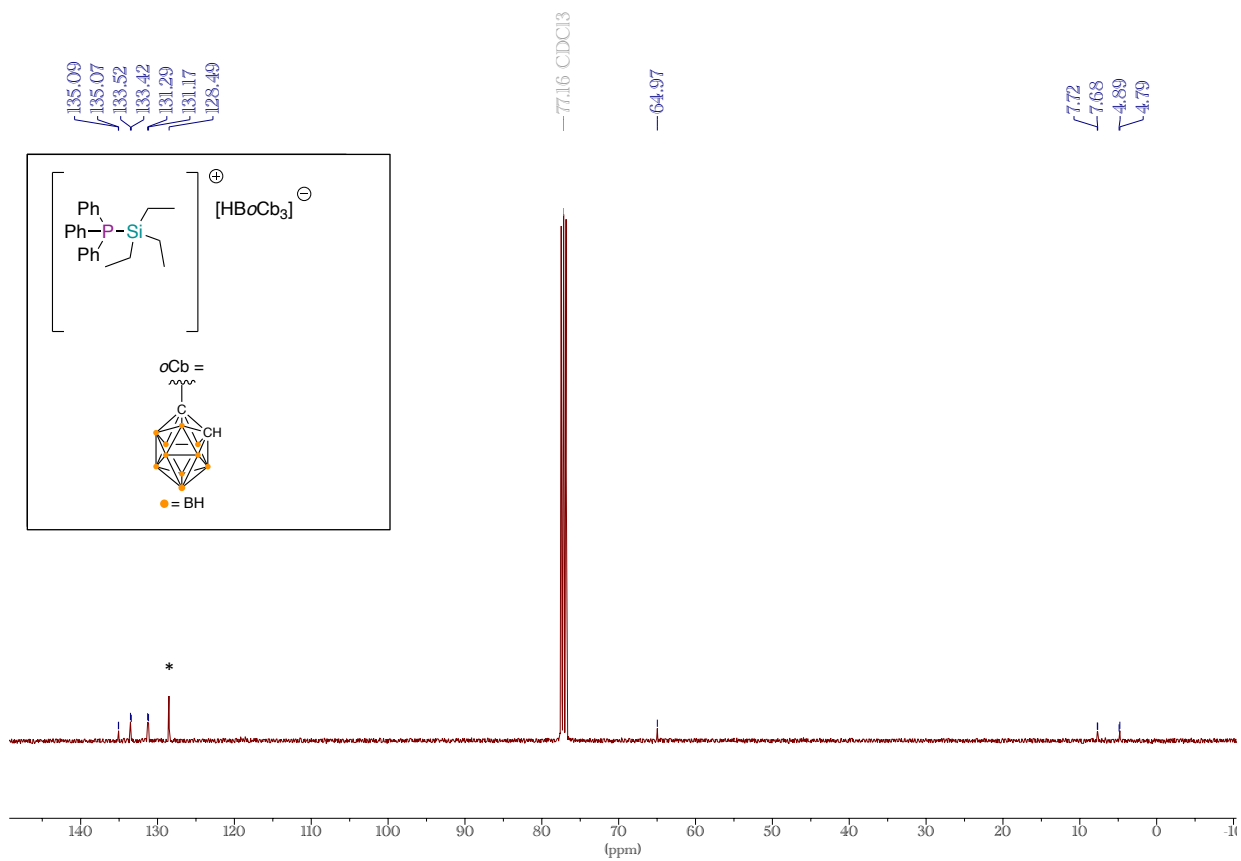



Figure S-15:  $^{11}\text{B}\{^1\text{H}\}$  NMR (128 MHz) spectrum of  $[\text{Ph}_3\text{PSiEt}_3][\text{HB}\sigma\text{Cb}_3]$  in  $\text{CDCl}_3$ .

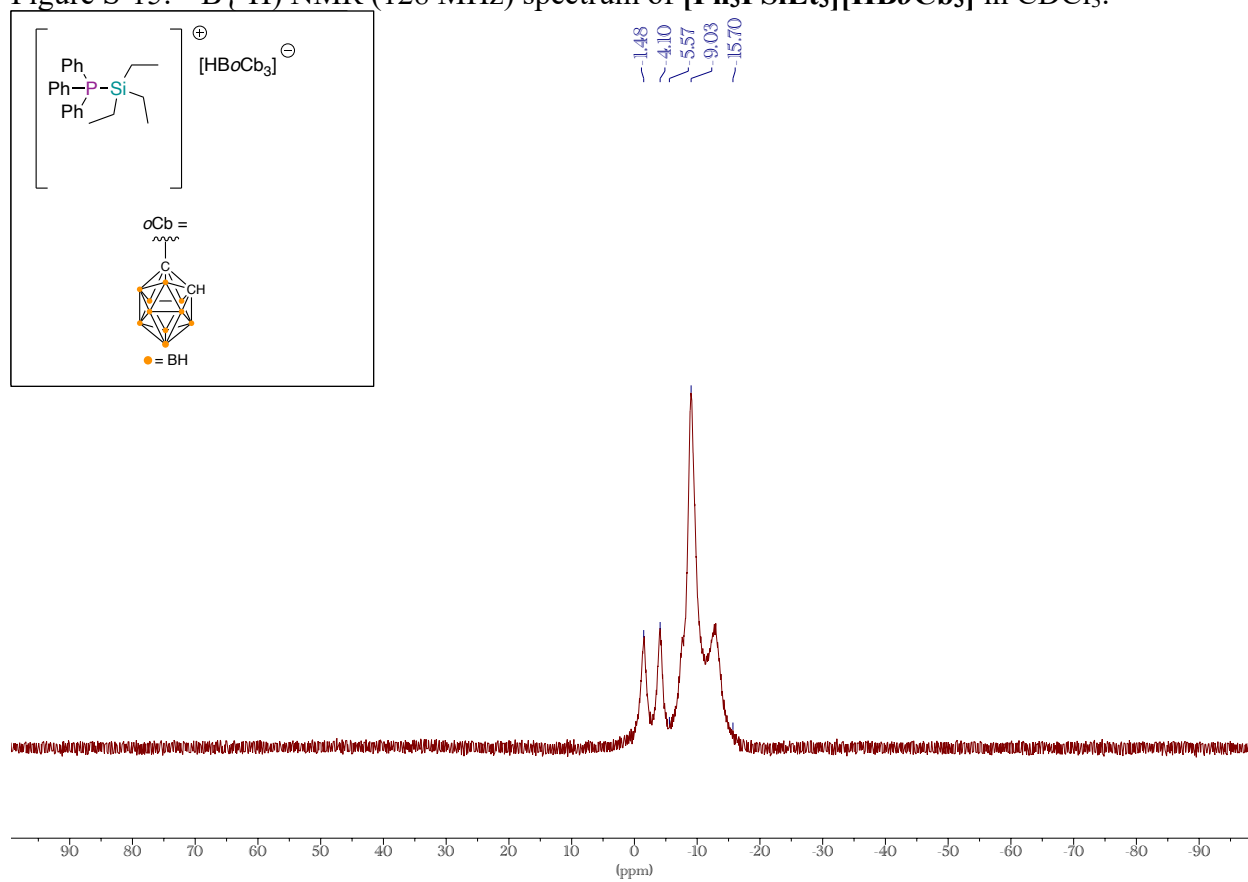

Figure S-16:  $^{11}\text{B}$  NMR (128 MHz) spectrum of  $[\text{Ph}_3\text{PSiEt}_3][\text{HB}\alpha\text{Cb}_3]$  in  $\text{CDCl}_3$ .

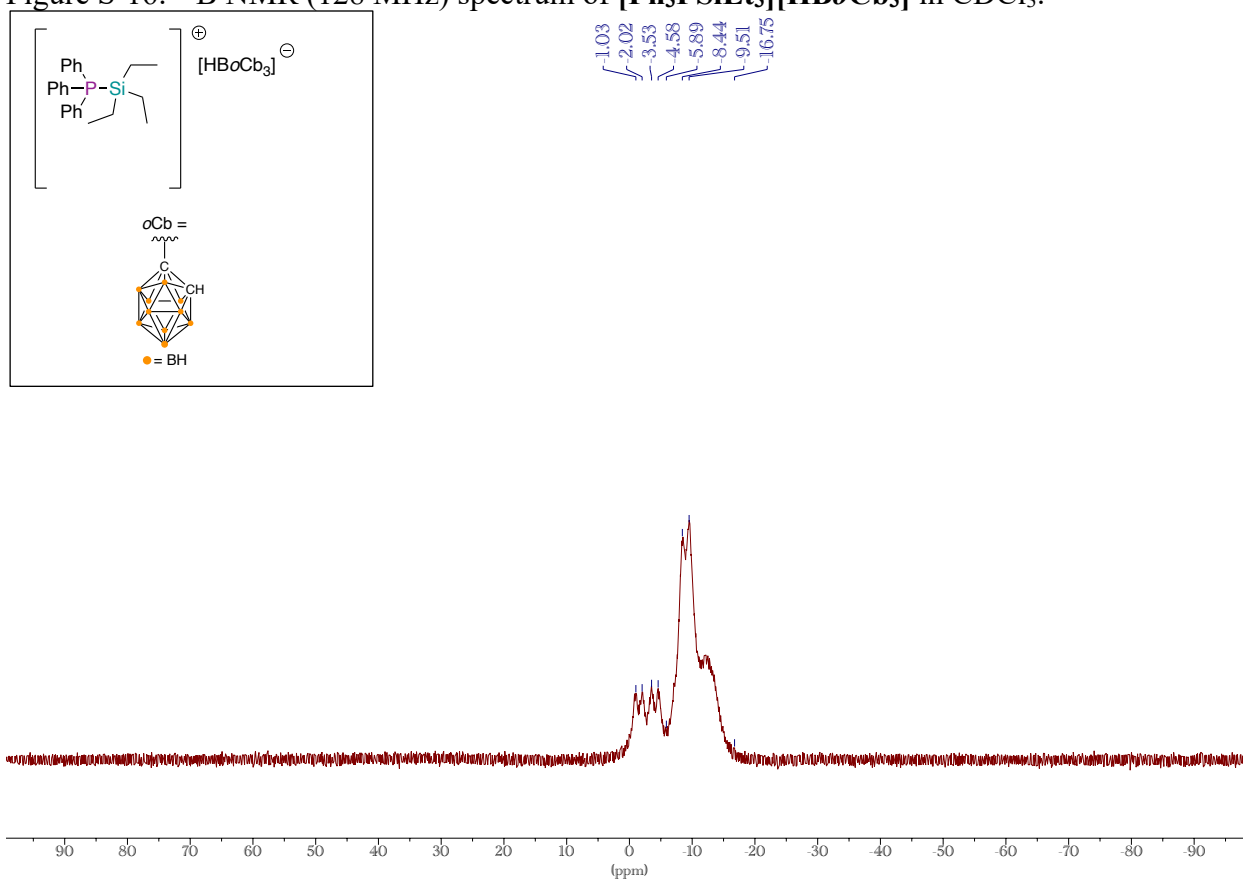

Figure S-17:  $^{31}\text{P}\{^1\text{H}\}$  NMR (162 MHz) spectrum of  $[\text{Ph}_3\text{PSiEt}_3][\text{HB}\sigma\text{Cb}_3]$  in  $\text{CDCl}_3$ .

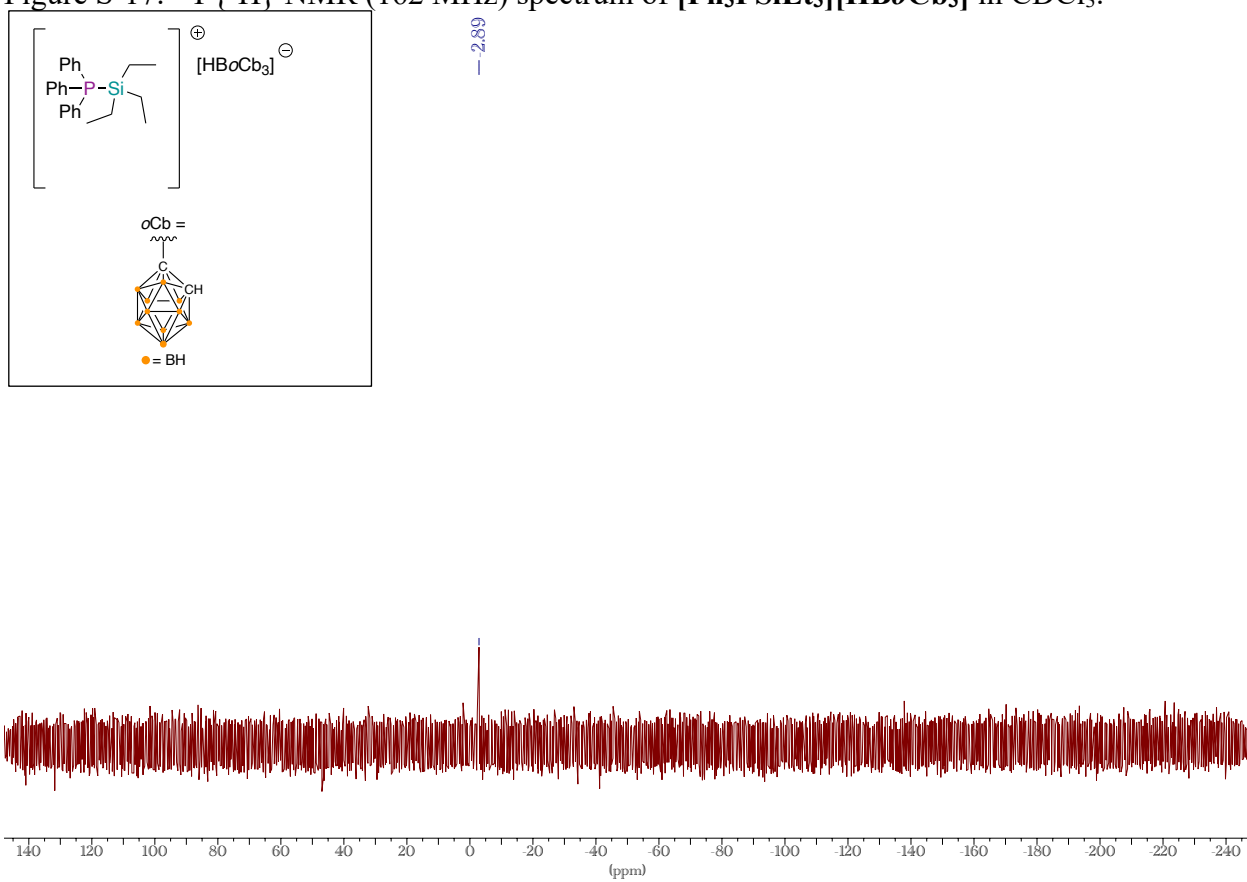

Figure S-18: FT-IR spectrum of  $[\text{Ph}_3\text{PSiEt}_3][\text{HB}o\text{Cb}_3]$ .

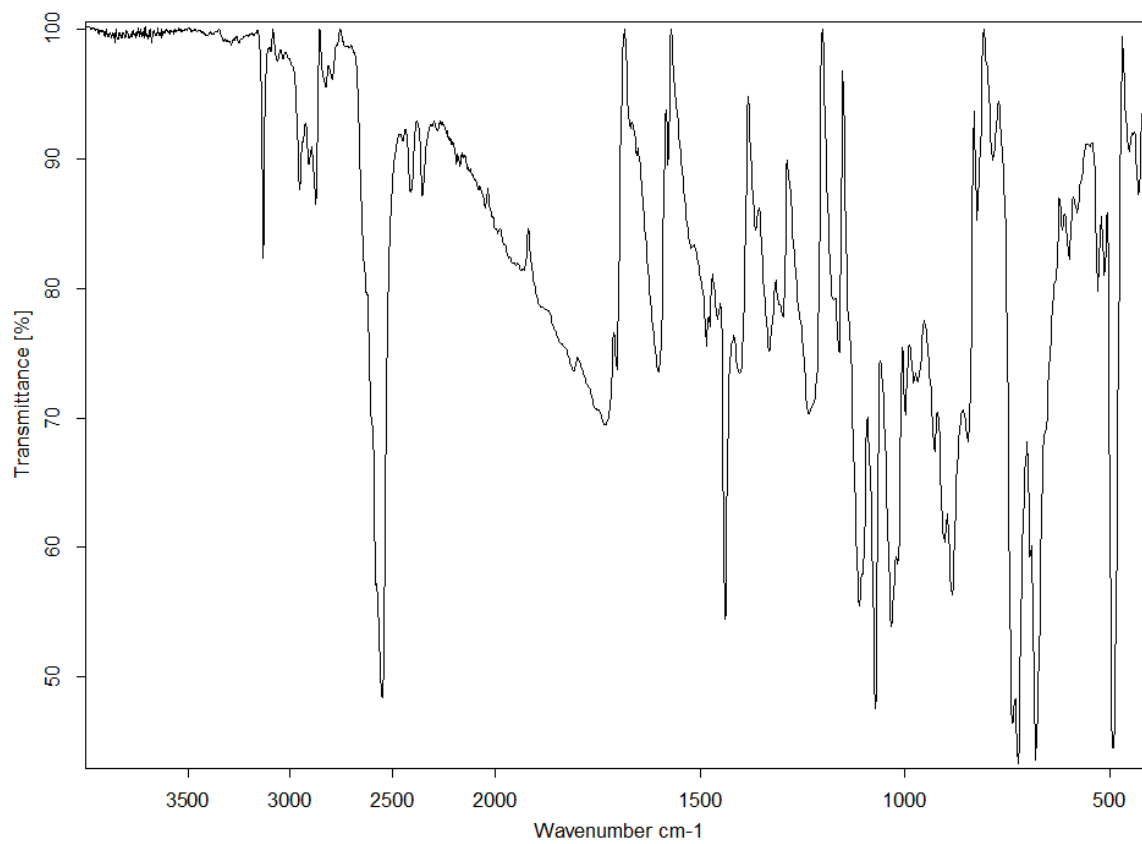

Figure S-19:  $^1\text{H}$  NMR (400 MHz) spectrum of  $[\text{Cy}_3\text{PSiEt}_3][\text{HBoCb}_3]$  in  $\text{CD}_2\text{Cl}_2$  (\* residual benzene).

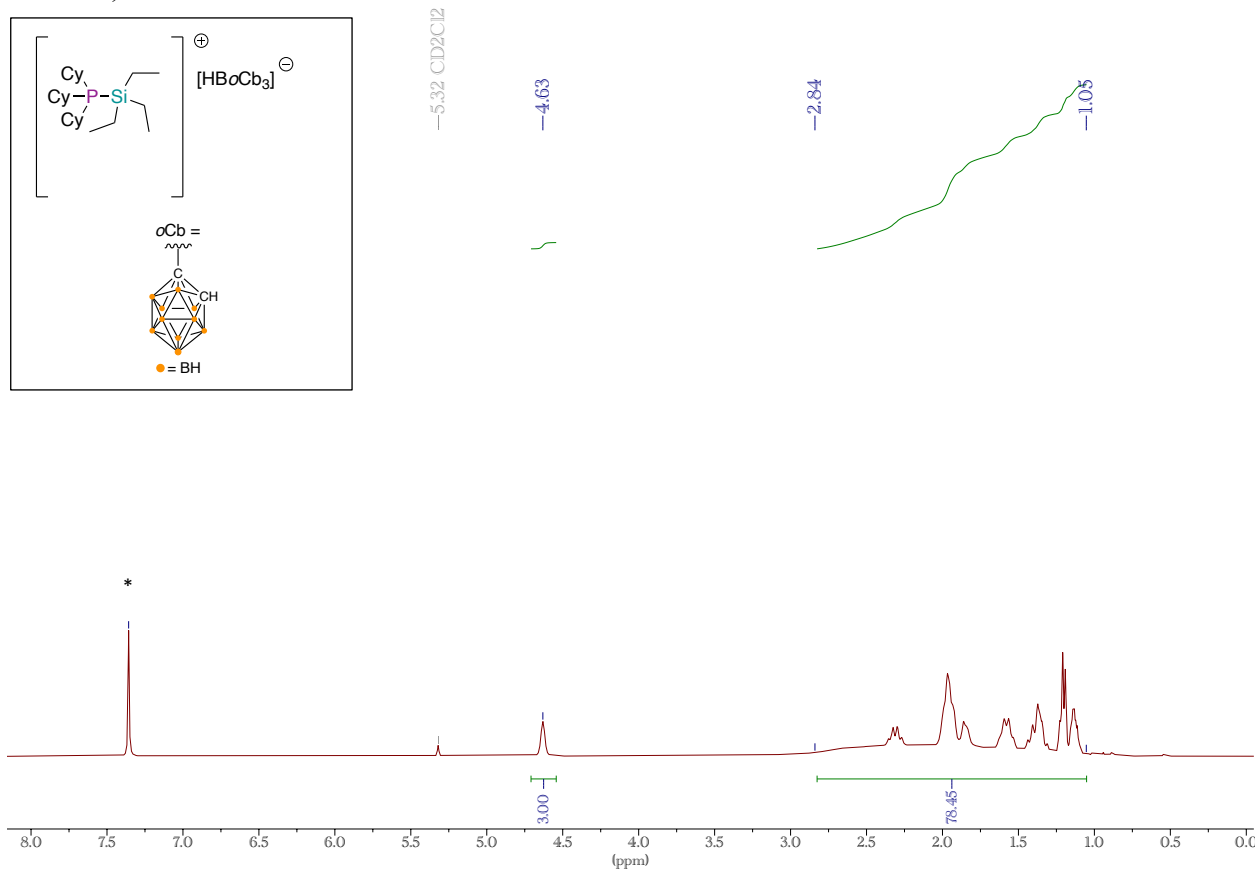

Figure S-20:  $^{13}\text{C}\{^1\text{H}\}$  NMR (101 MHz) spectrum of  $[\text{Cy}_3\text{PSiEt}_3][\text{HB}\sigma\text{Cb}_3]$  in  $\text{CD}_2\text{Cl}_2$  (\* residual benzene).

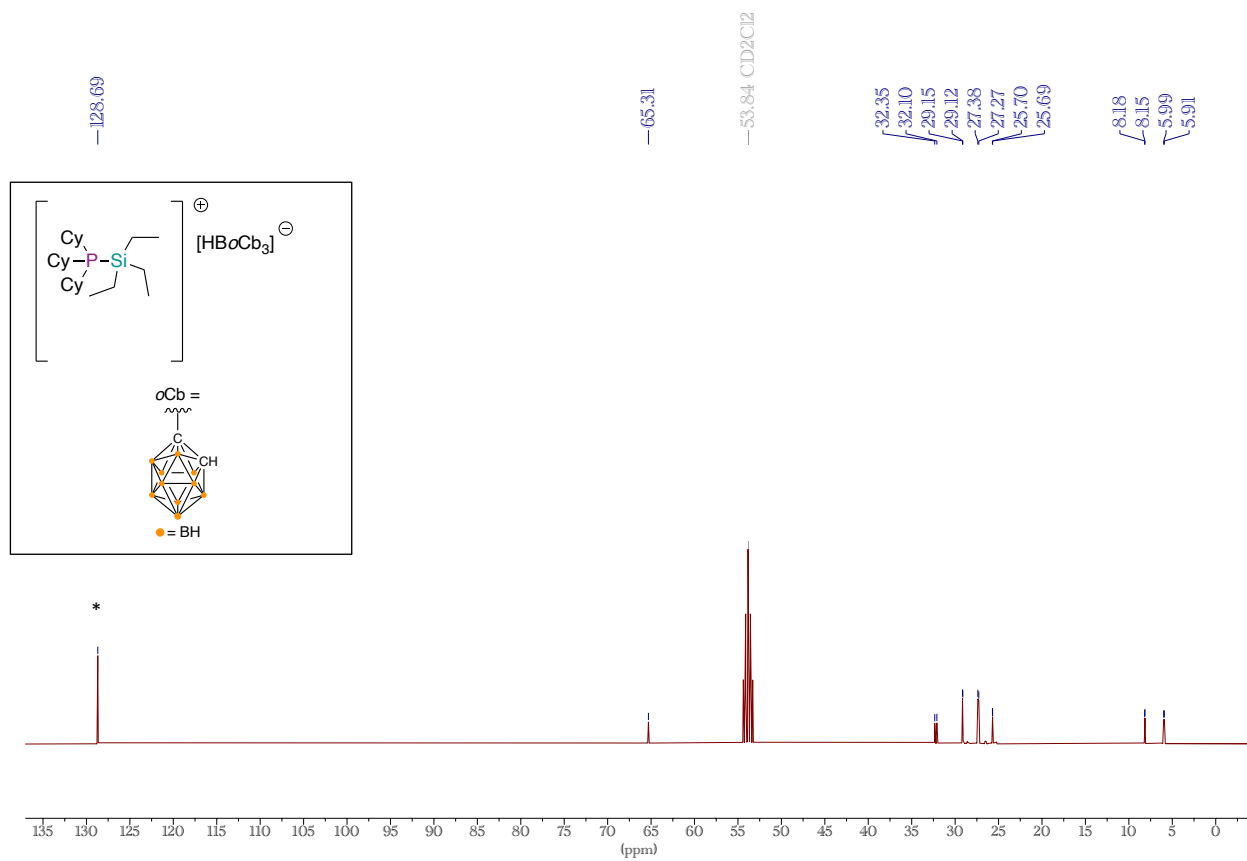

Figure S-21:  $^{11}\text{B}\{^1\text{H}\}$  NMR (128 MHz) spectrum of  $[\text{Cy}_3\text{PSiEt}_3][\text{HB}\sigma\text{Cb}_3]$  in  $\text{CD}_2\text{Cl}_2$ .

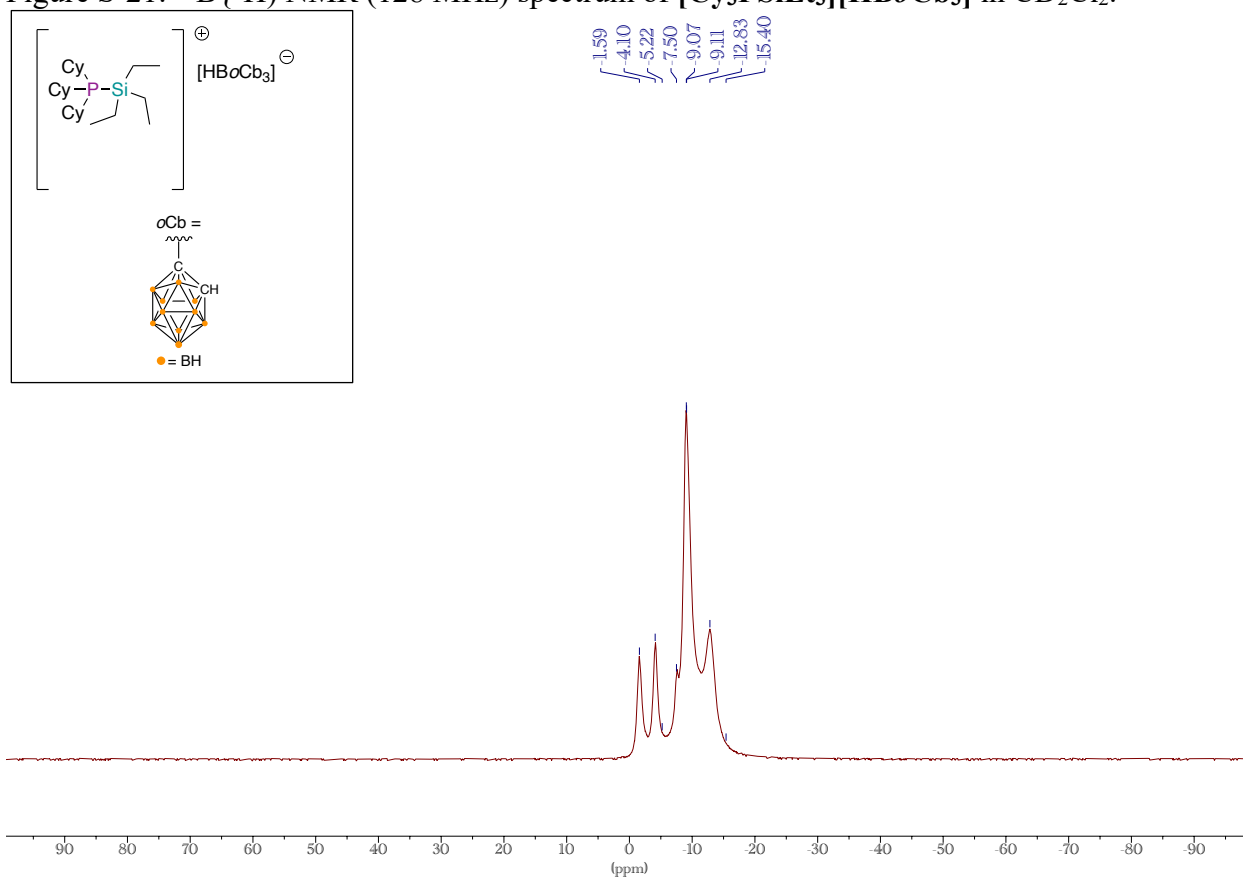

Figure S-22:  $^{11}\text{B}$  NMR (128 MHz) spectrum of  $[\text{Cy}_3\text{PSiEt}_3][\text{HB}o\text{Cb}_3]$  in  $\text{CD}_2\text{Cl}_2$ .

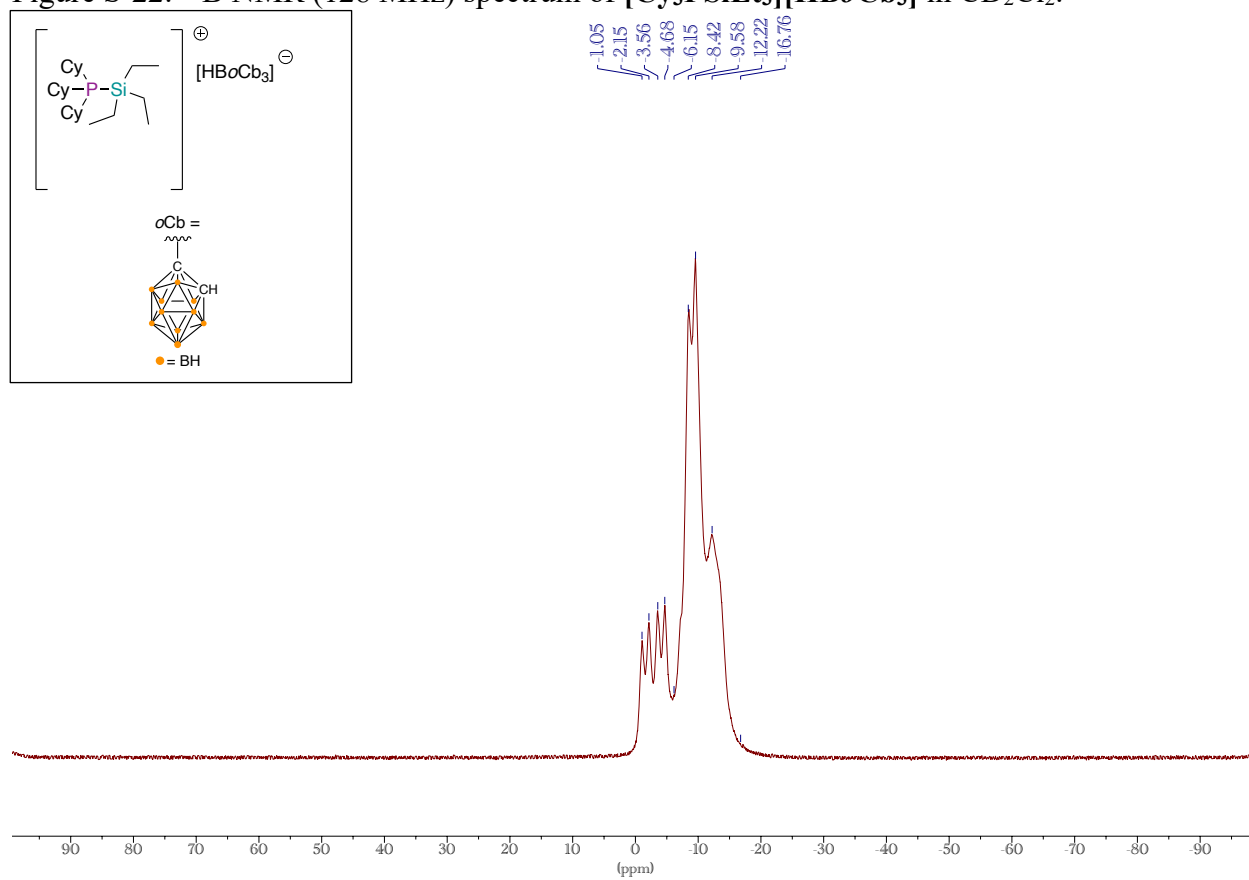



Figure S-23:  $^{31}\text{P}\{^1\text{H}\}$  NMR (162 MHz) spectrum of  $[\text{Cy}_3\text{PSiEt}_3][\text{HB}o\text{Cb}_3]$  in  $\text{CD}_2\text{Cl}_2$ .

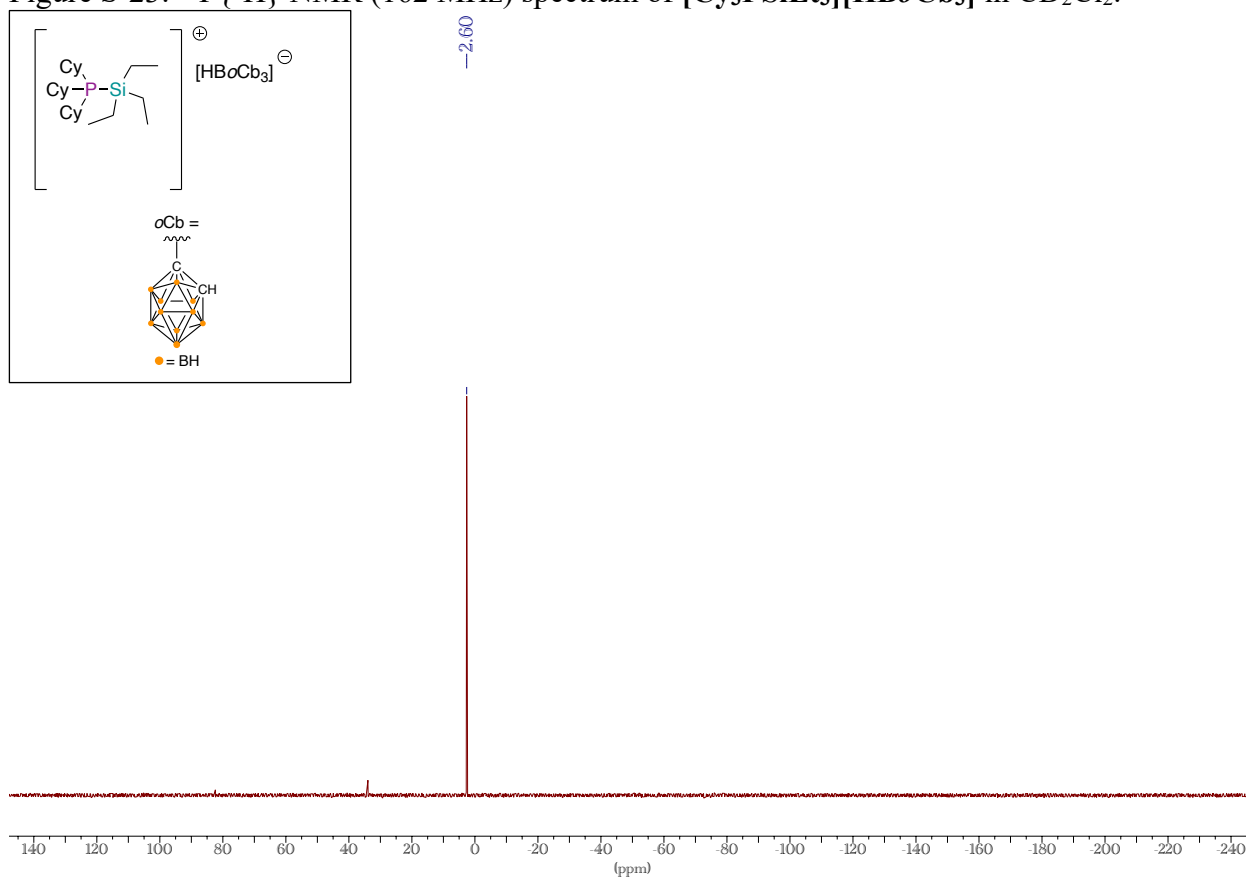

Figure S-24: FT-IR spectrum of  $[\text{Cy}_3\text{PSiEt}_3][\text{HB}_0\text{Cb}_3]$ .

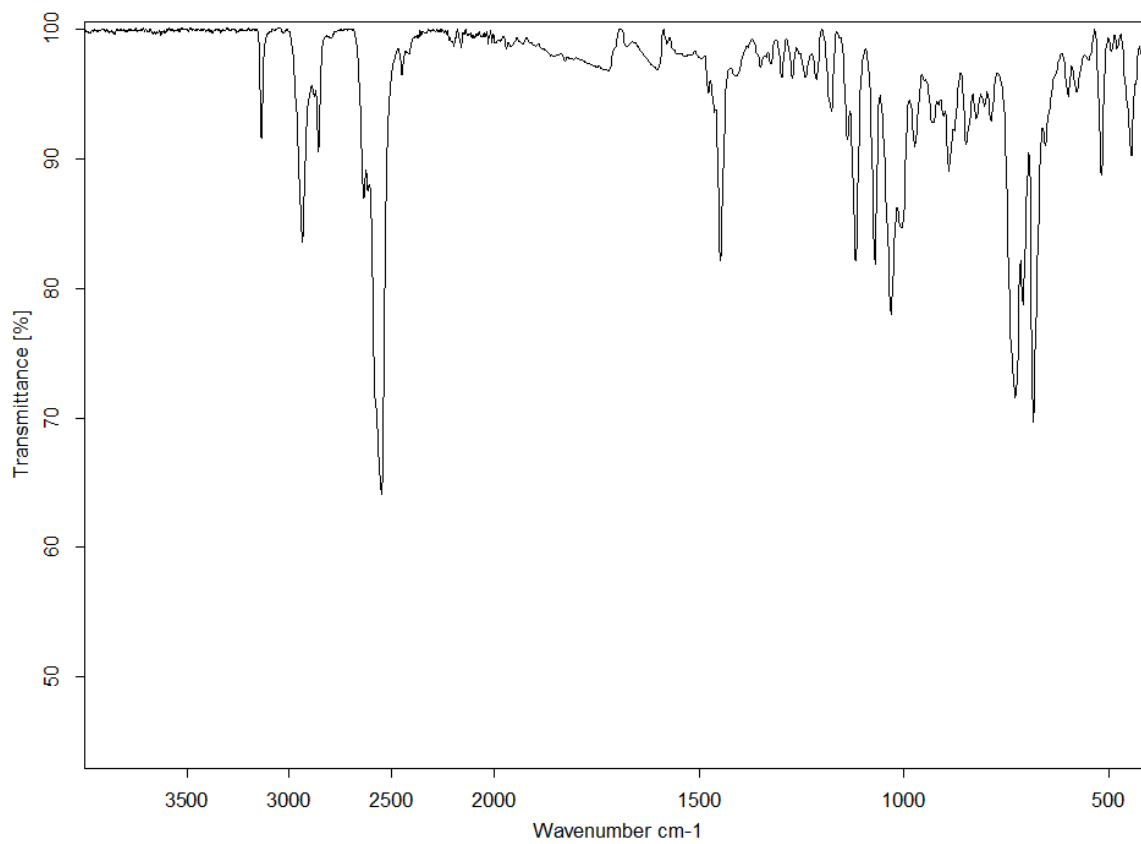

Figure S-25:  $^1\text{H}$  NMR (400 MHz) spectrum of  $[(p\text{-Cl-C}_6\text{H}_4)_3\text{PSiEt}_3][\text{HBoCb}_3]$  in  $\text{CDCl}_3$ .

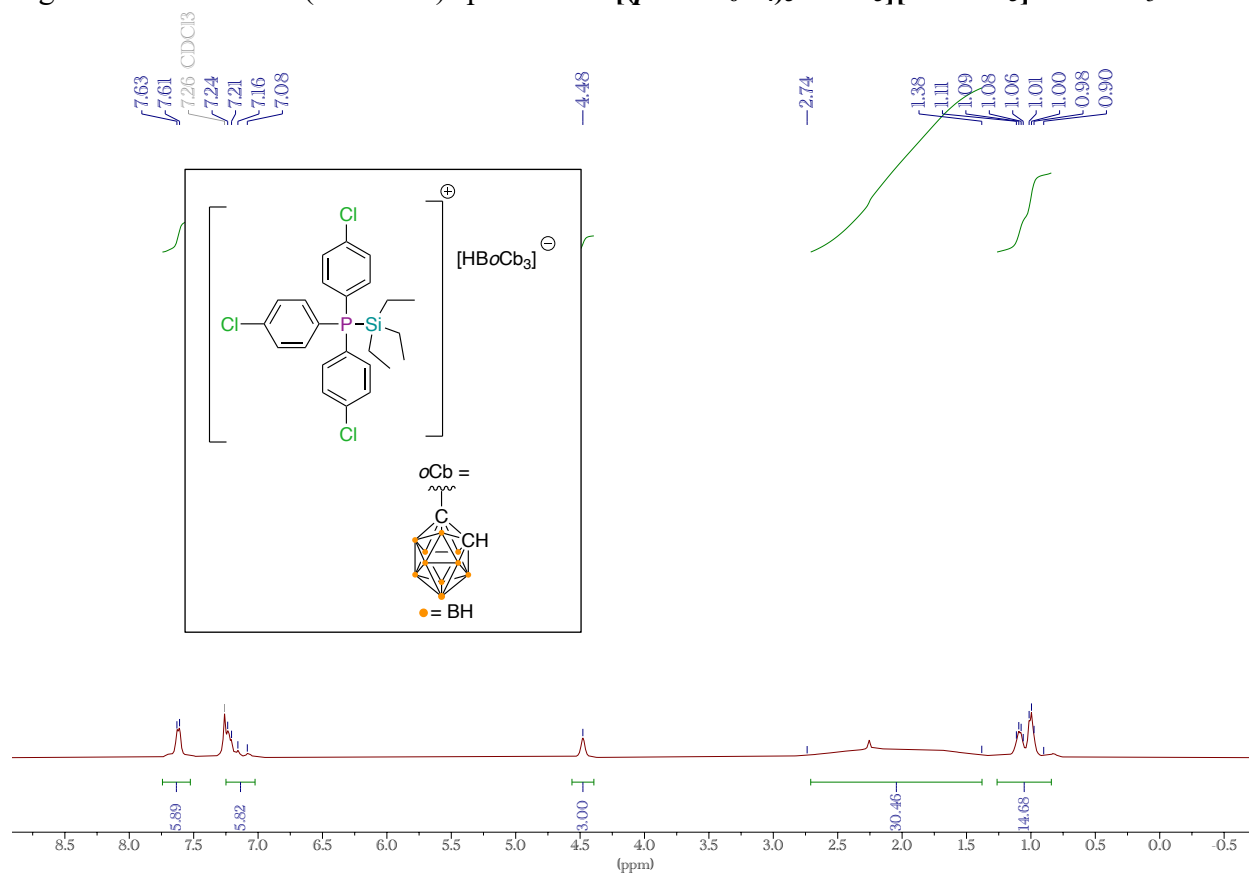

Figure S-26:  $^{13}\text{C}\{^1\text{H}\}$  NMR (101 MHz) spectrum of  $[(p\text{-Cl-C}_6\text{H}_4)_3\text{PSiEt}_3][\text{HB}o\text{Cb}_3]$  in  $\text{CDCl}_3$  (\* residual benzene).

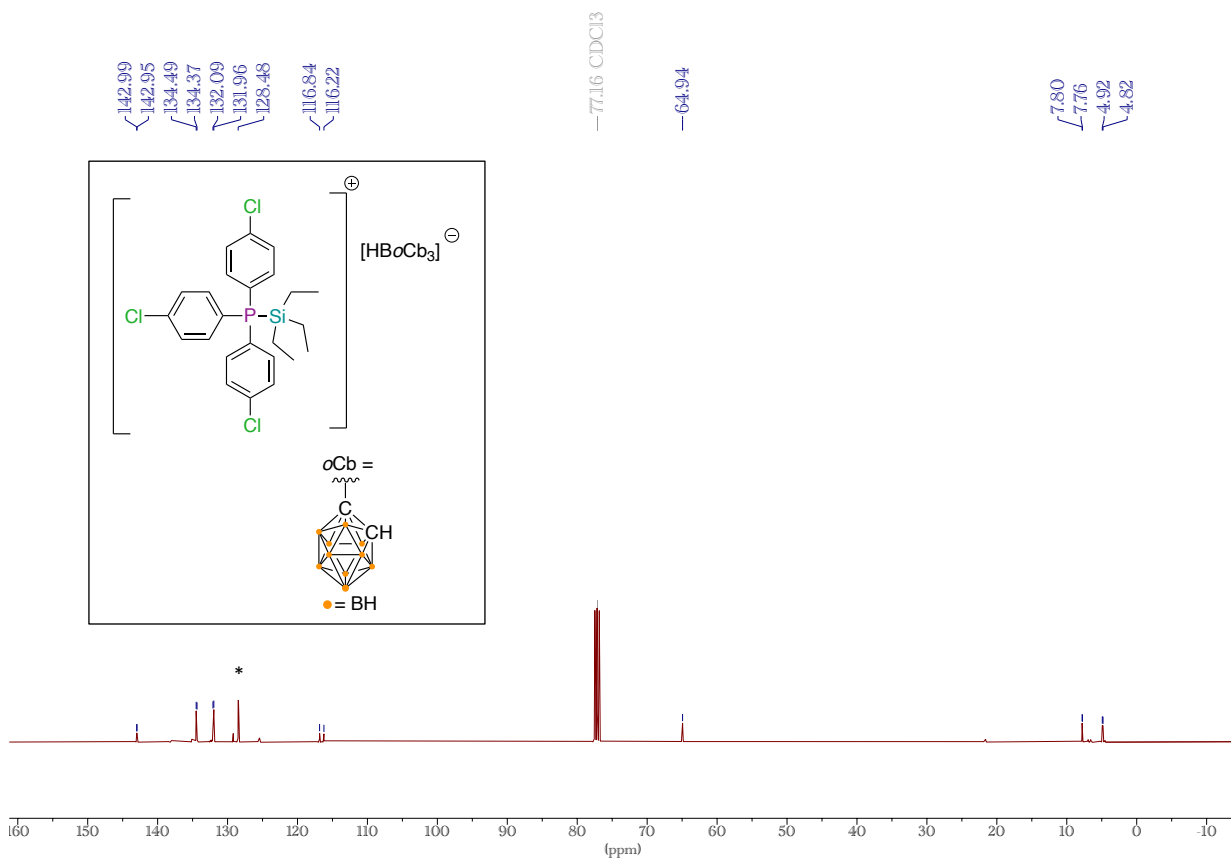

Figure S-27:  $^{11}\text{B}\{^1\text{H}\}$  NMR (128 MHz) spectrum of  $[(p\text{-Cl-C}_6\text{H}_4)_3\text{PSiEt}_3][\text{HB}\sigma\text{Cb}_3]$  in  $\text{CDCl}_3$ .

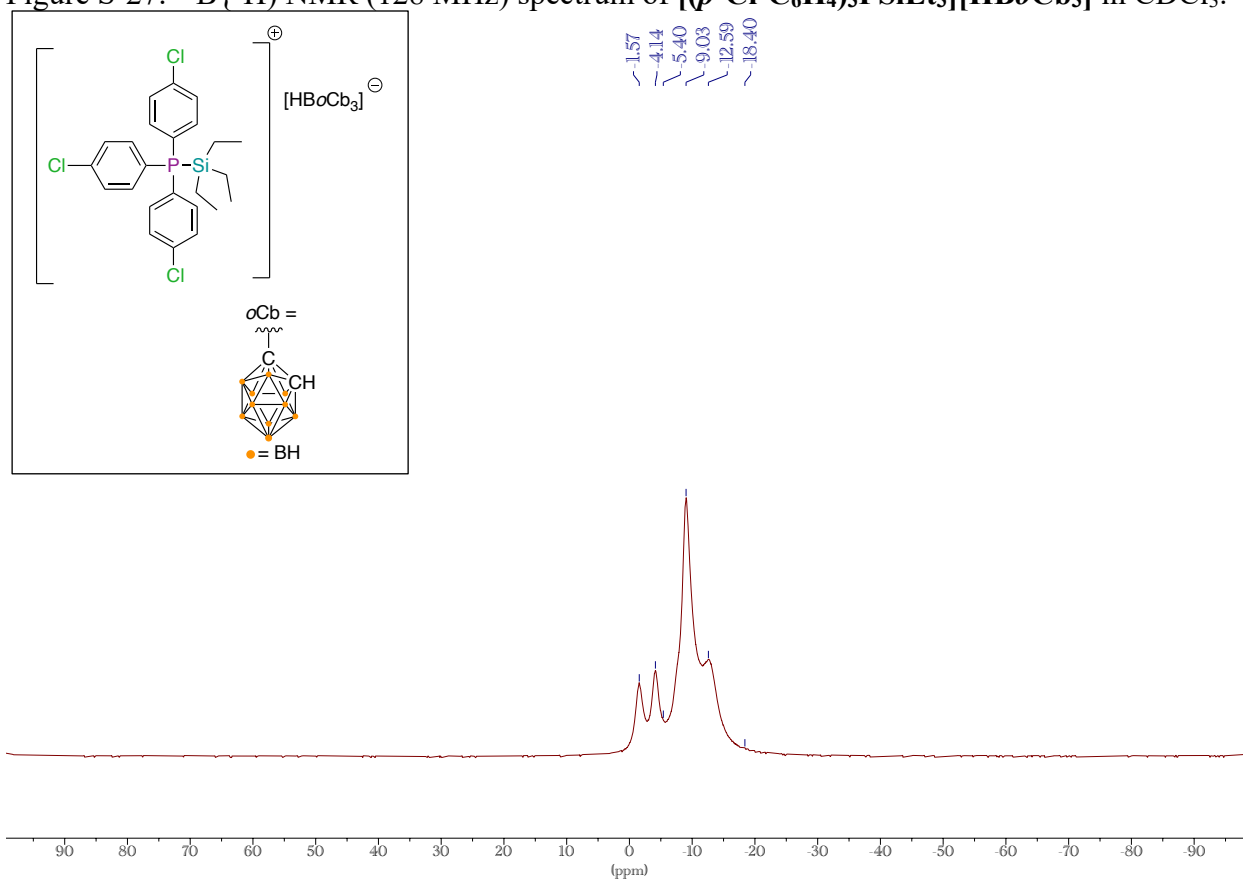

Figure S-28:  $^{11}\text{B}$  NMR (128 MHz) spectrum of  $[(p\text{-Cl-C}_6\text{H}_4)_3\text{PSiEt}_3][\text{HB}o\text{Cb}_3]$  in  $\text{CDCl}_3$ .

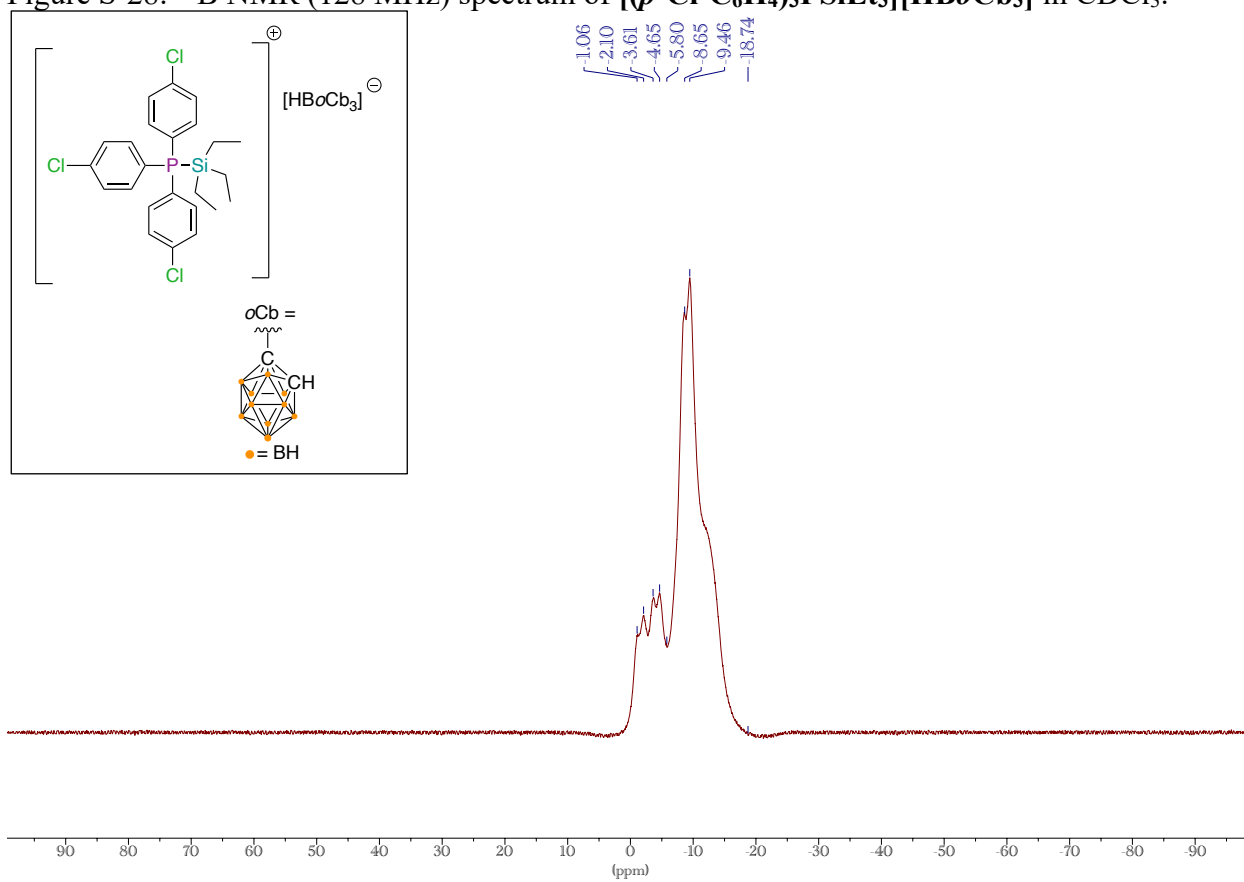

Figure S-29:  $^{31}\text{P}\{^1\text{H}\}$  NMR (162 MHz) spectrum of  $[(p\text{-Cl-C}_6\text{H}_4)_3\text{PSiEt}_3][\text{HB}\alpha\text{Cb}_3]$  in  $\text{CDCl}_3$ .

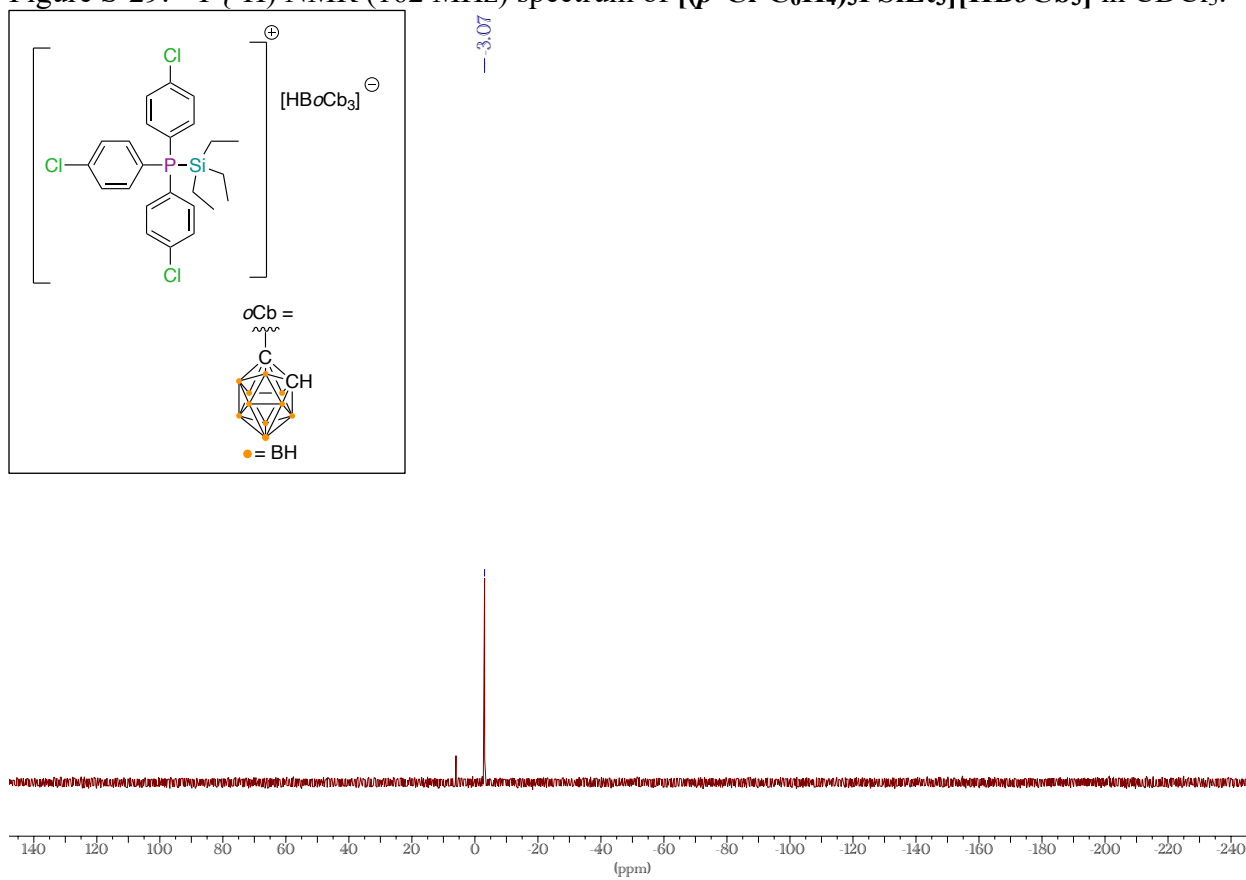

Figure S-30: FT-IR spectrum of  $[(p\text{-Cl-C}_6\text{H}_4)_3\text{P SiEt}_3][\text{HB}o\text{Cb}_3]$ .

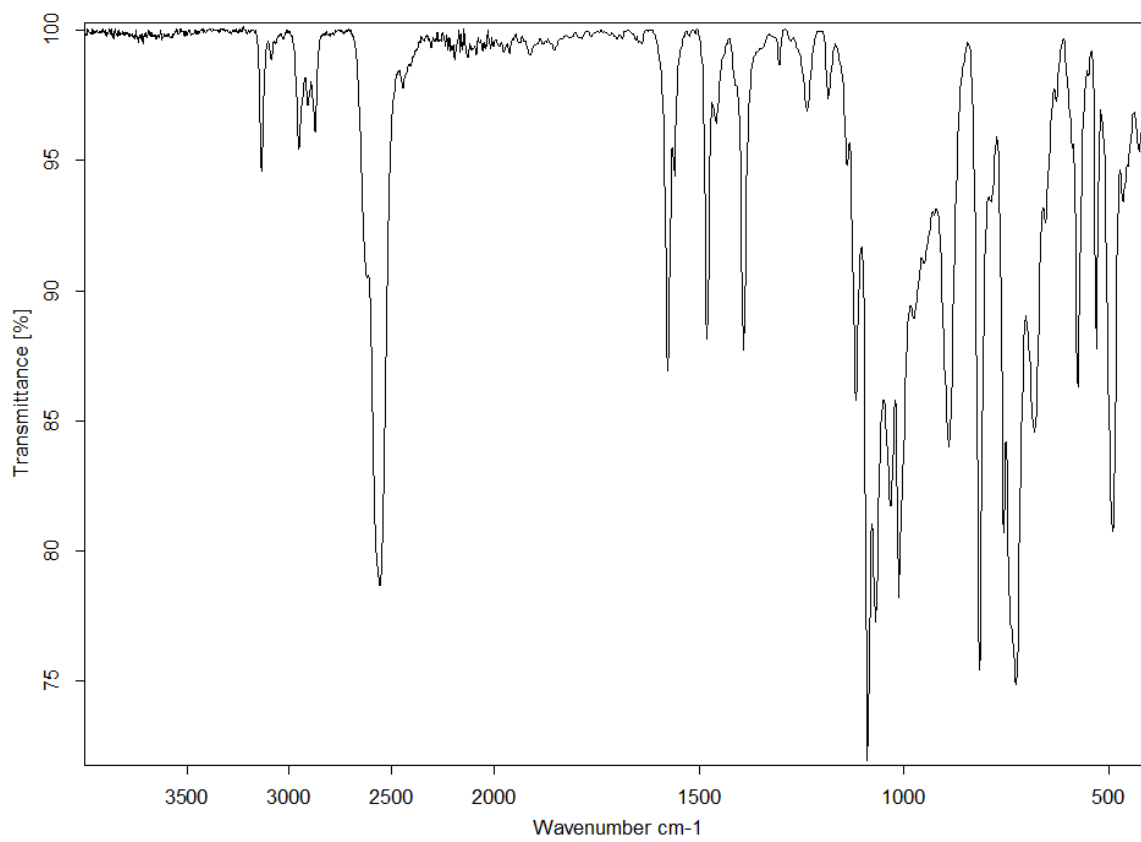



Figure S-31:  $^1\text{H}$  NMR (400 MHz) spectrum of  $[(o\text{-tol})_3\text{PSiEt}_3][\text{HB}o\text{Cb}_3]$  in  $\text{CDCl}_3$  (\* residual benzene and  $\Delta$  residual  $n$ -pentane).

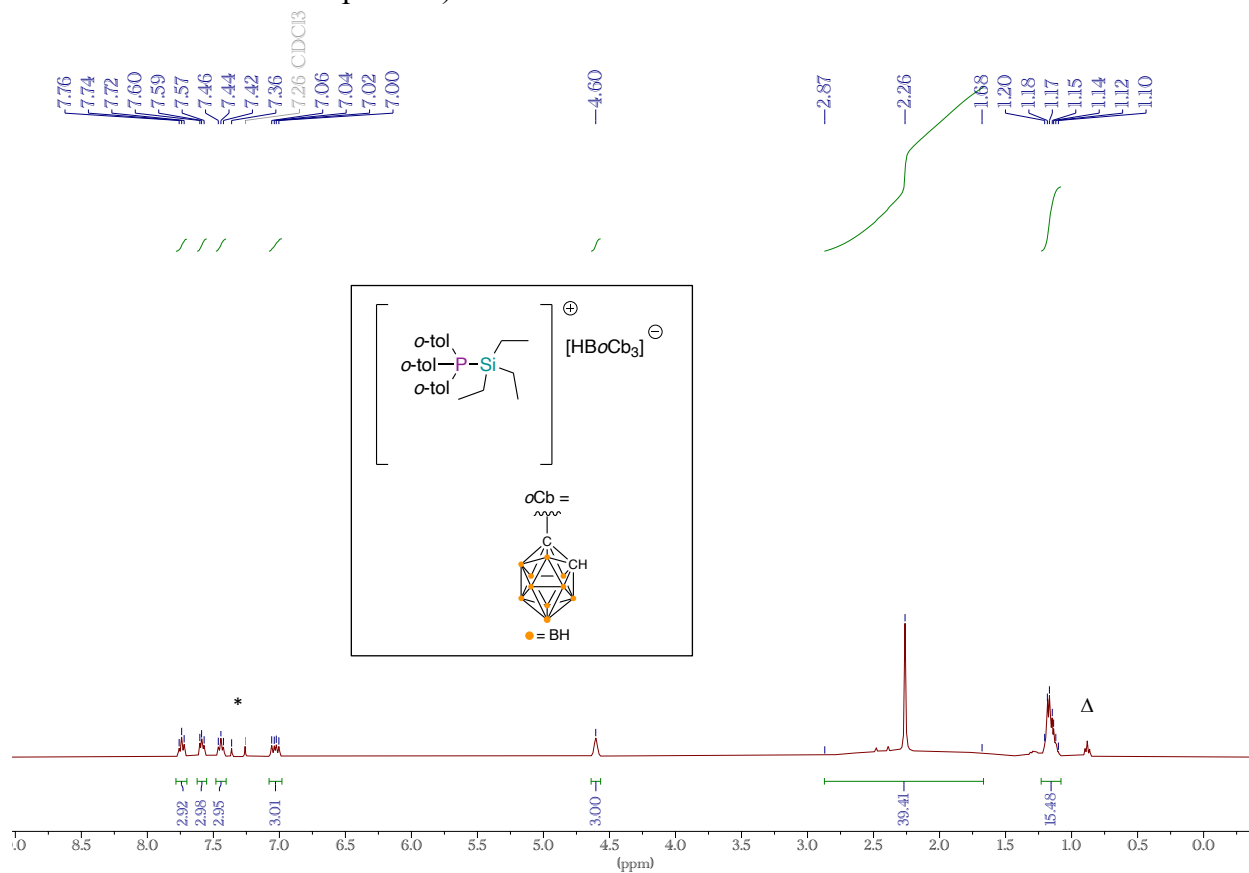

Figure S-32:  $^{13}\text{C}\{^1\text{H}\}$  NMR (101 MHz) spectrum of  $[(o\text{-tol})_3\text{PSiEt}_3][\text{H}\text{B}o\text{Cb}_3]$  in  $\text{CDCl}_3$  ( $\Delta$  residual *n*-pentane).

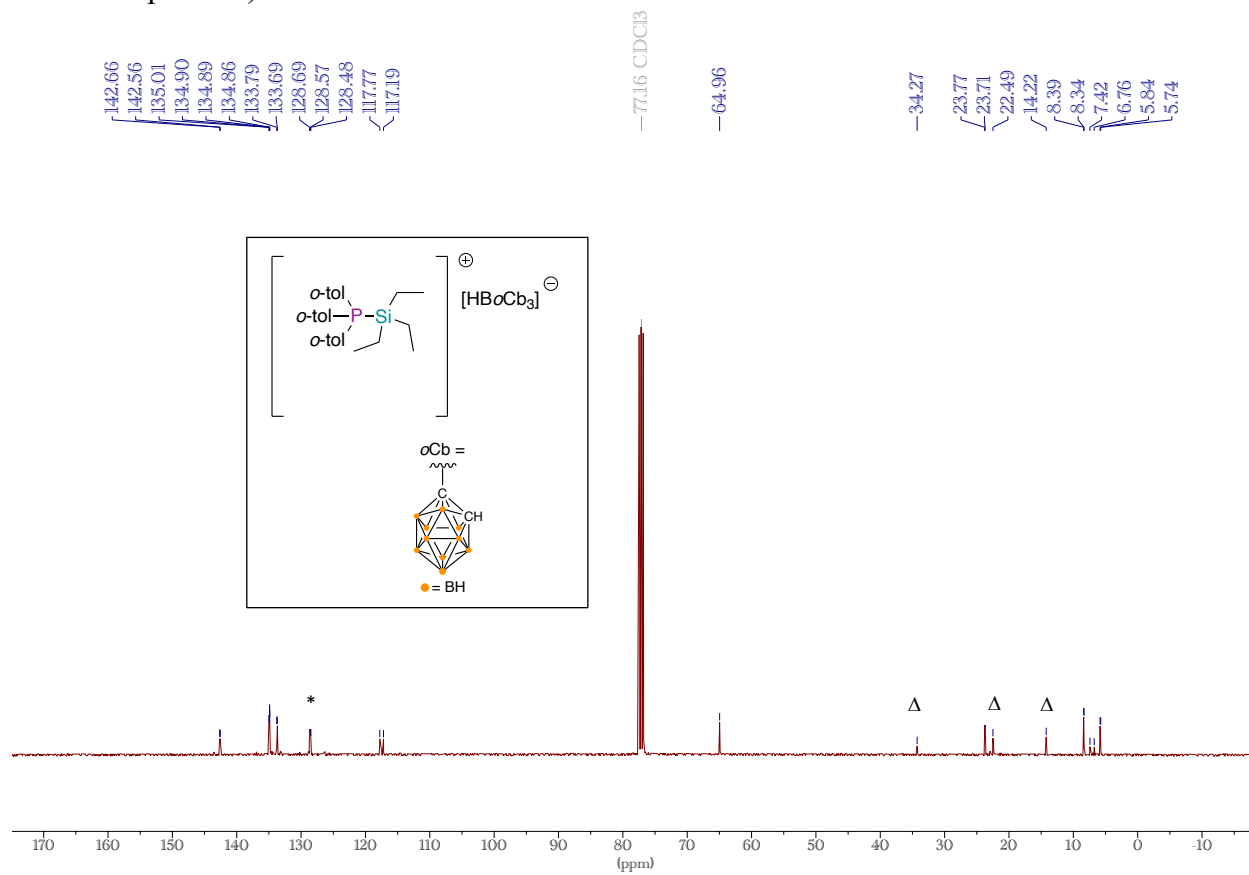

Figure S-33:  $^{11}\text{B}\{^1\text{H}\}$  NMR (128 MHz) spectrum of  $[(o\text{-tol})_3\text{PSiEt}_3][\text{HB}o\text{Cb}_3]$  in  $\text{CDCl}_3$ .

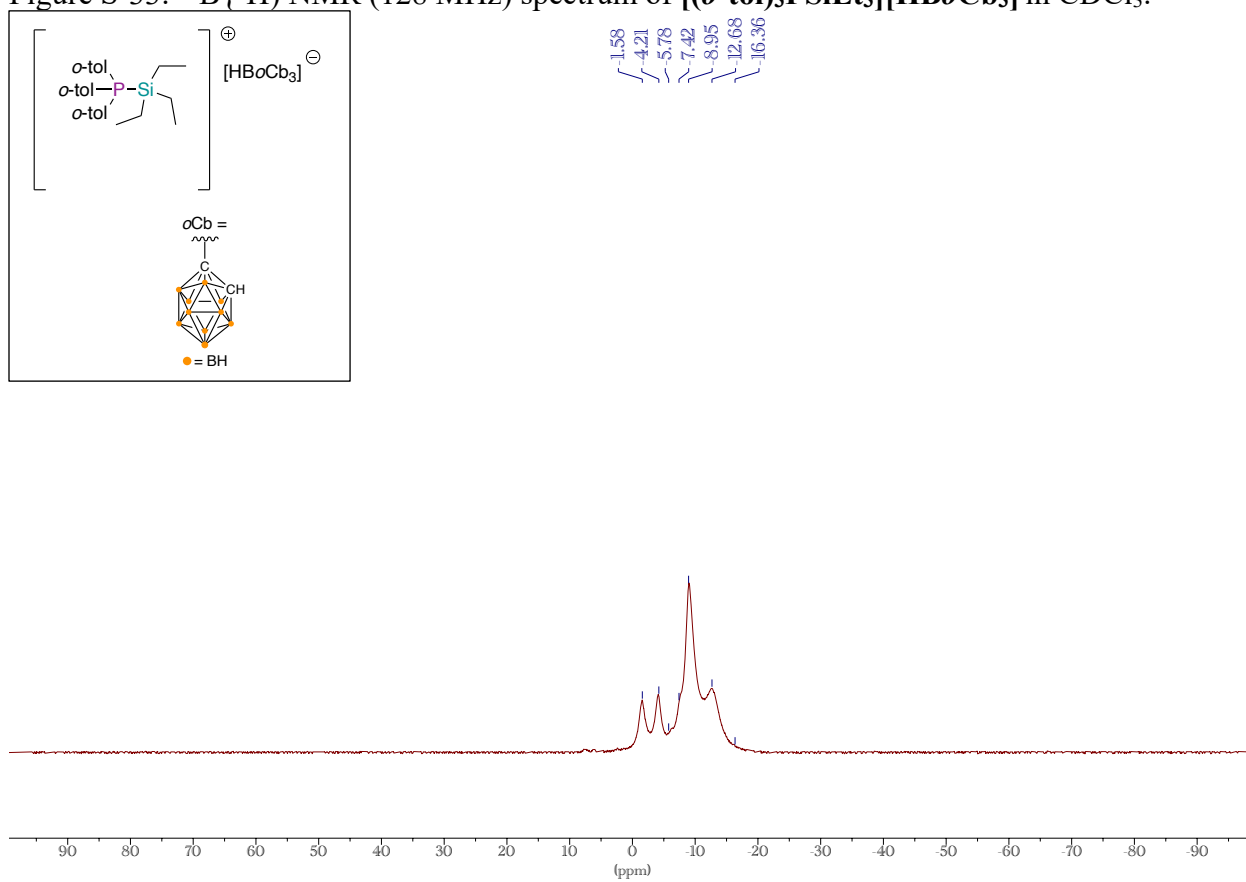

Figure S-34:  $^{11}\text{B}$  NMR (128 MHz) spectrum of  $[(o\text{-tol})_3\text{PSiEt}_3][\text{HB}o\text{Cb}_3]$  in  $\text{CDCl}_3$ .

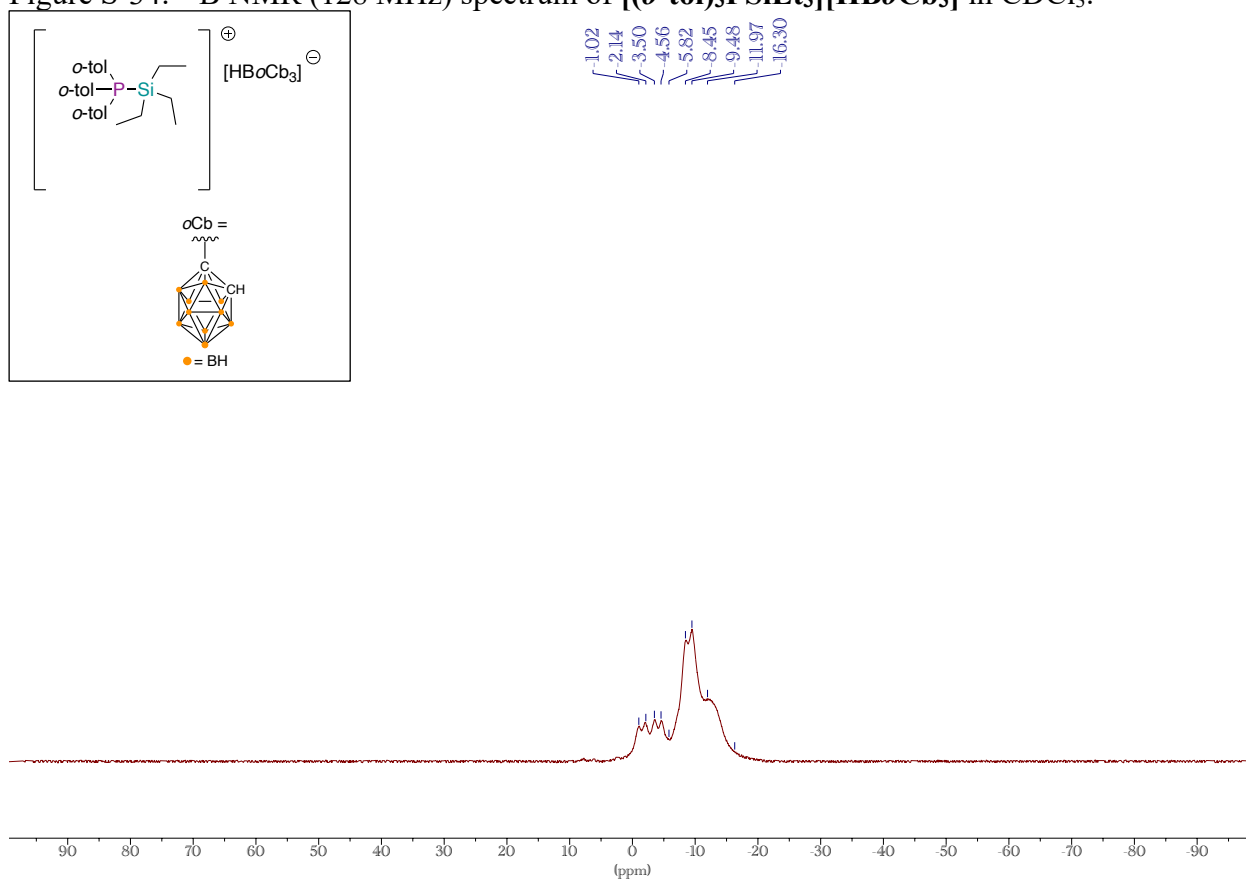

Figure S-35:  $^{31}\text{P}\{^1\text{H}\}$  NMR (162 MHz) spectrum of  $[(o\text{-tol})_3\text{PSiEt}_3][\text{HB}o\text{Cb}_3]$  in  $\text{CDCl}_3$ .

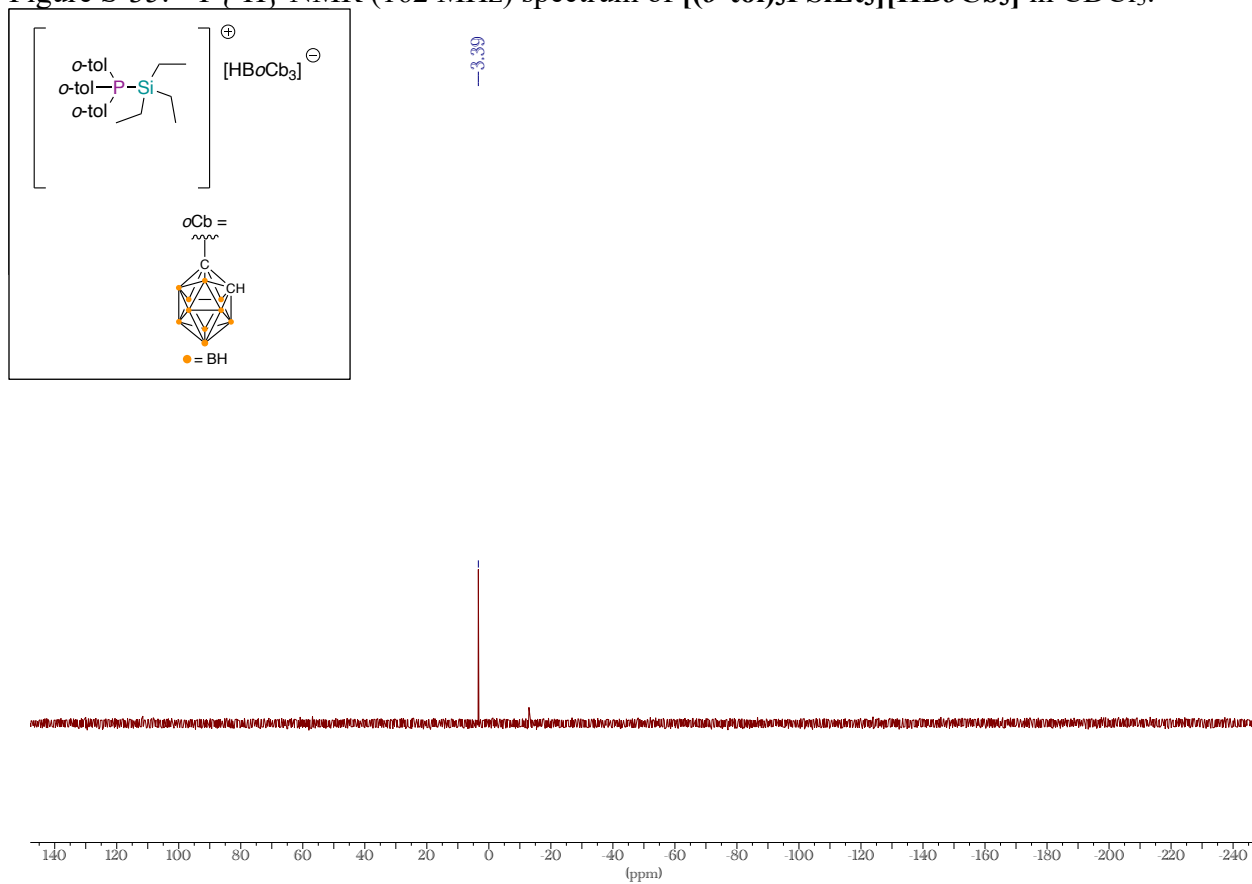

Figure S-36: FT-IR spectrum of [(*o*-tol)<sub>3</sub>PSiEt<sub>3</sub>][HB*o*Cb<sub>3</sub>].

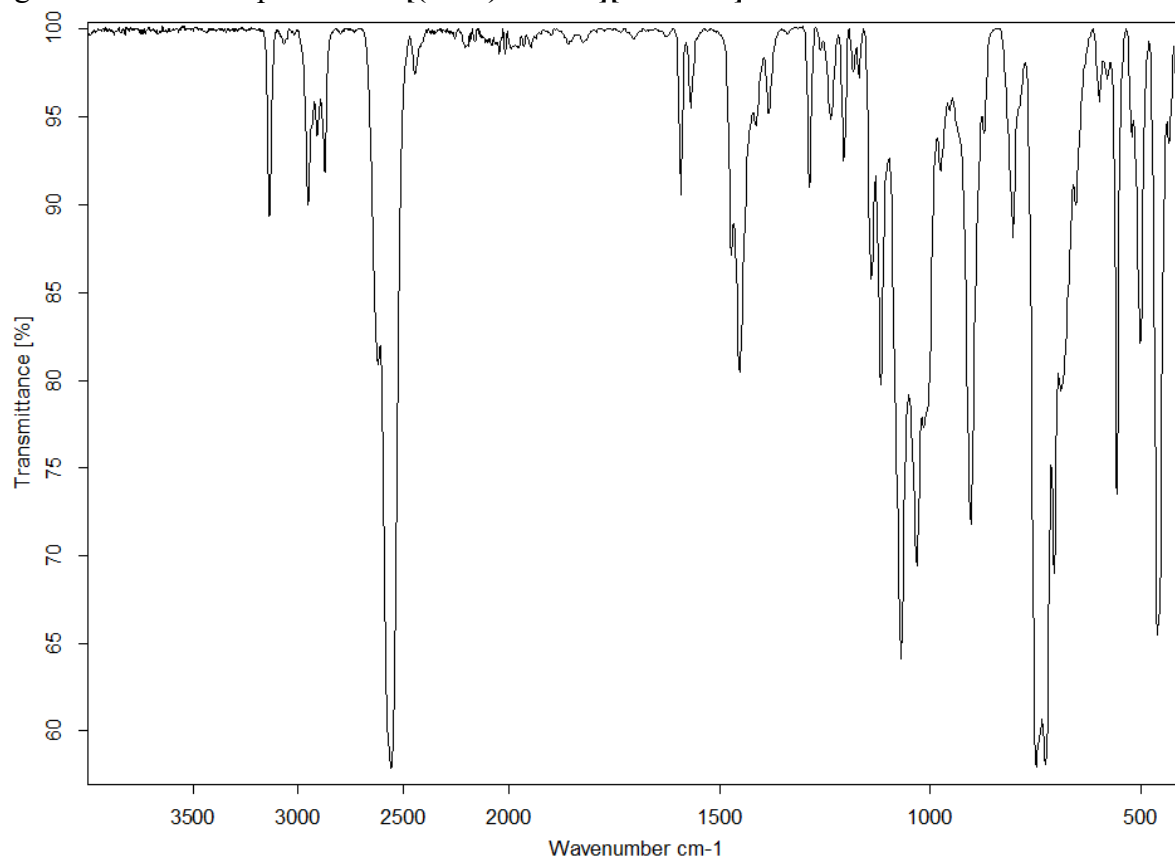

Figure S-37:  $^1\text{H}$  NMR (400 MHz) spectrum of  $[(p\text{-F-C}_6\text{H}_4)_3\text{PSiEt}_3][\text{HBoCb}_3]$  in  $\text{CDCl}_3$  (\* residual benzene).

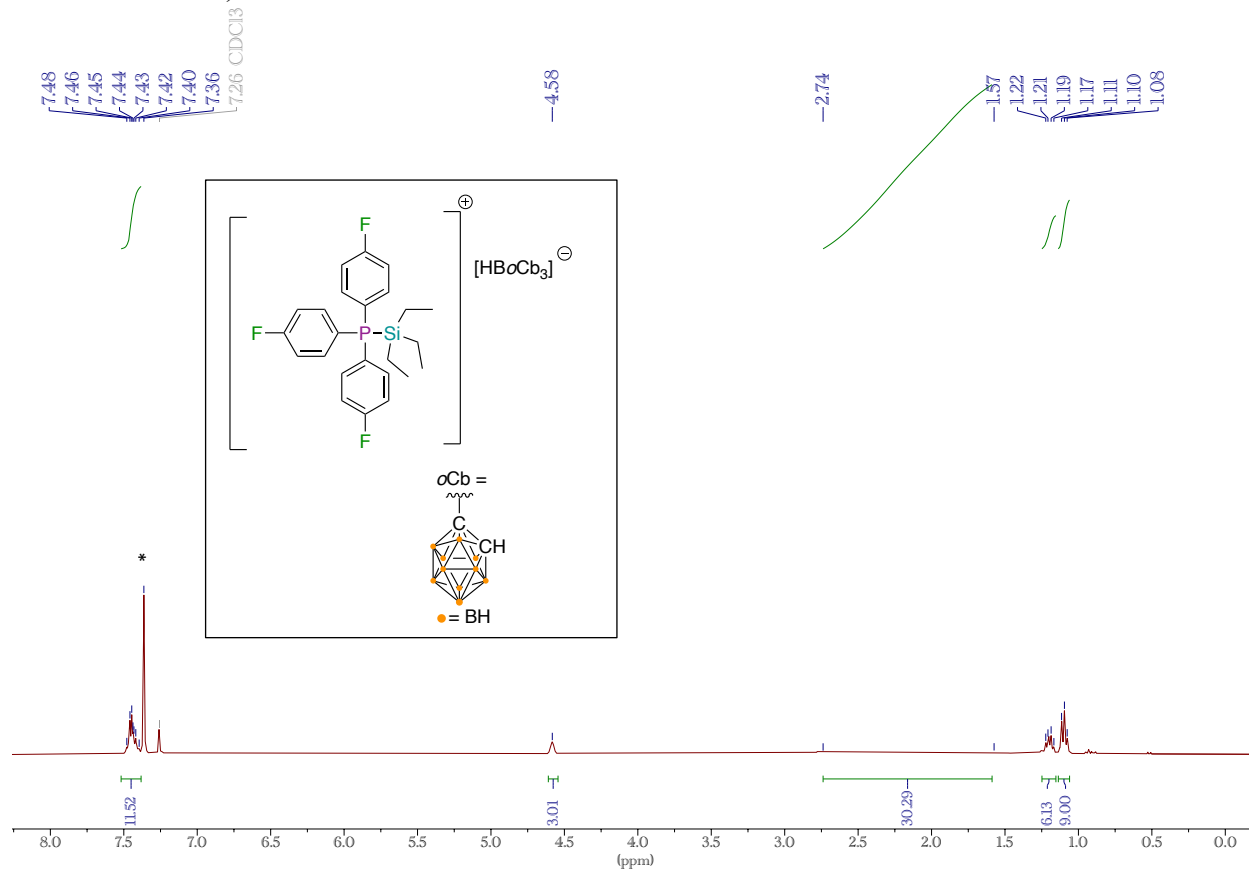

Figure S-38:  $^{13}\text{C}\{^1\text{H}\}$  NMR (101 MHz) spectrum of  $[(p\text{-F-C}_6\text{H}_4)_3\text{PSiEt}_3][\text{HB}\sigma\text{Cb}_3]$  in  $\text{CDCl}_3$  (\* residual benzene).

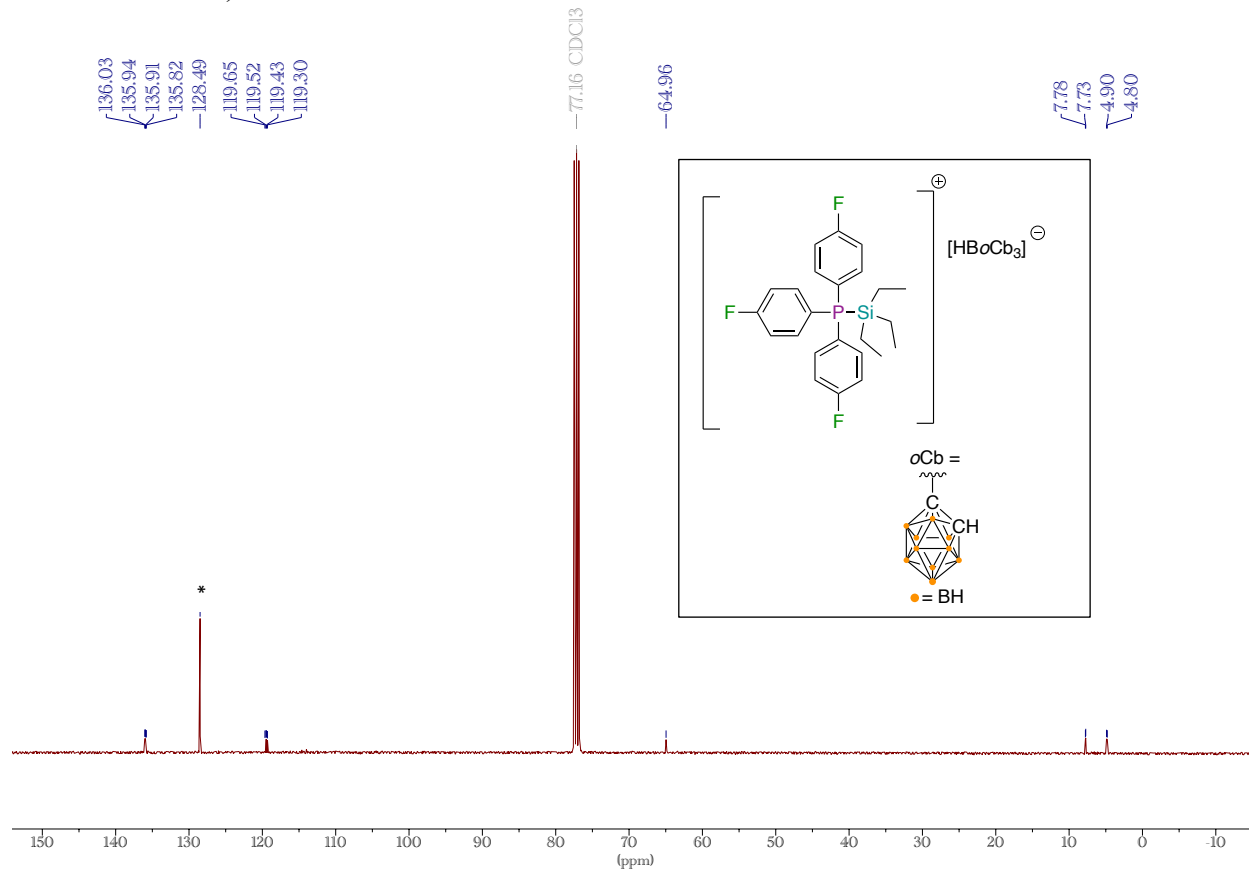



Figure S-39:  $^{11}\text{B}\{^1\text{H}\}$  NMR (128 MHz) spectrum of  $[(p\text{-F-C}_6\text{H}_4)_3\text{PSiEt}_3][\text{HBoCb}_3]$  in  $\text{CDCl}_3$ .

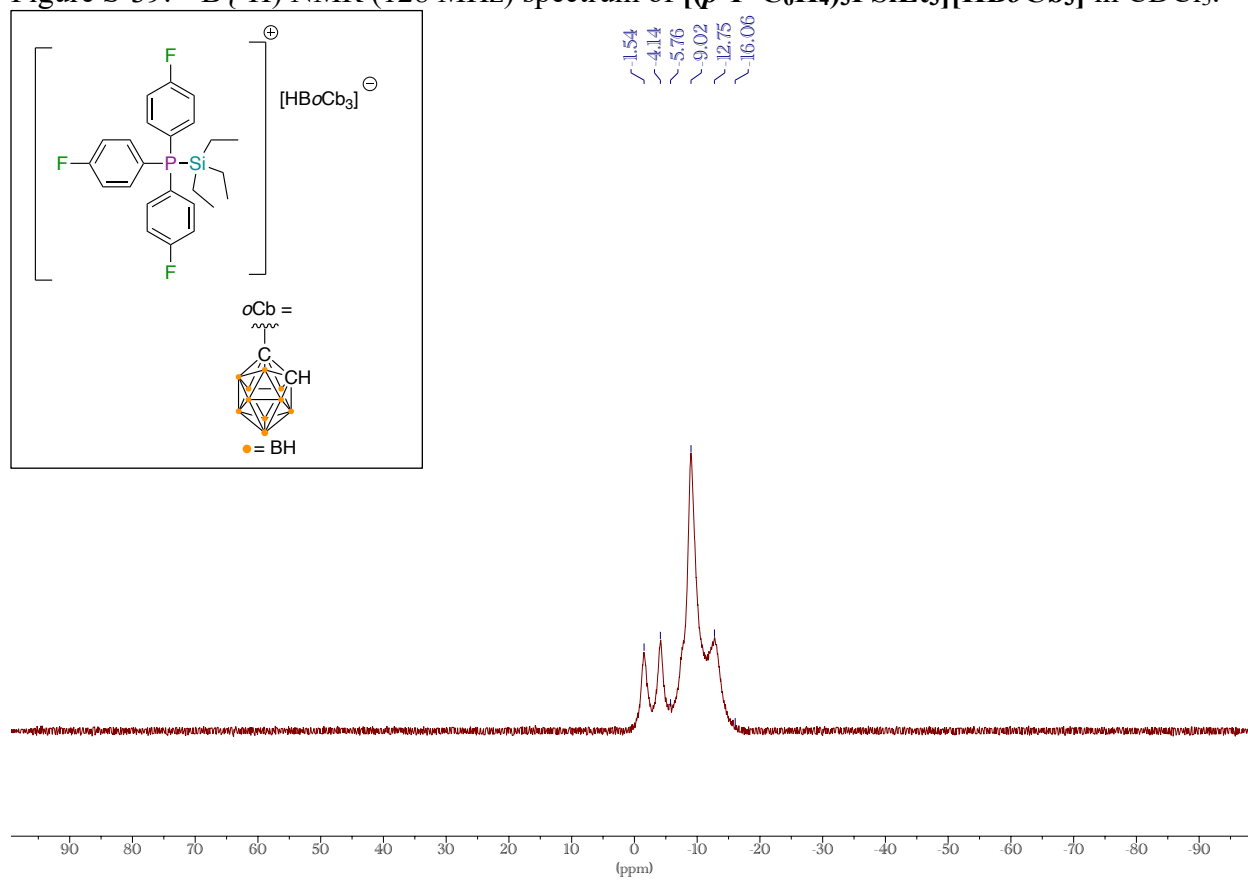

Figure S-40:  $^{11}\text{B}$  NMR (128 MHz) spectrum of  $[(p\text{-F-C}_6\text{H}_4)_3\text{PSiEt}_3][\text{HB}o\text{Cb}_3]$  in  $\text{CDCl}_3$ .

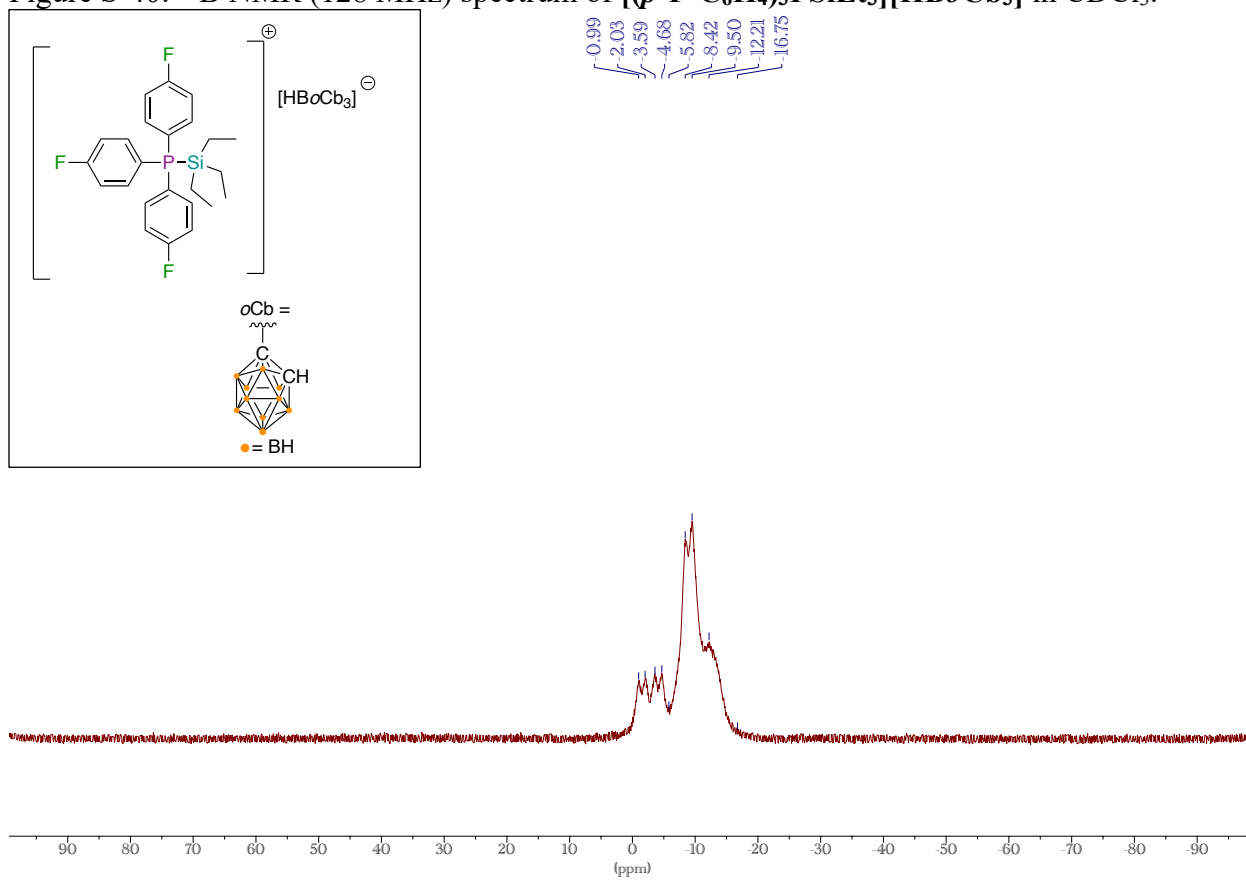

Figure S-41:  $^{31}\text{P}\{^1\text{H}\}$  NMR (162 MHz) spectrum of  $[(p\text{-F-C}_6\text{H}_4)_3\text{PSiEt}_3][\text{HB}o\text{Cb}_3]$  in  $\text{CDCl}_3$ .

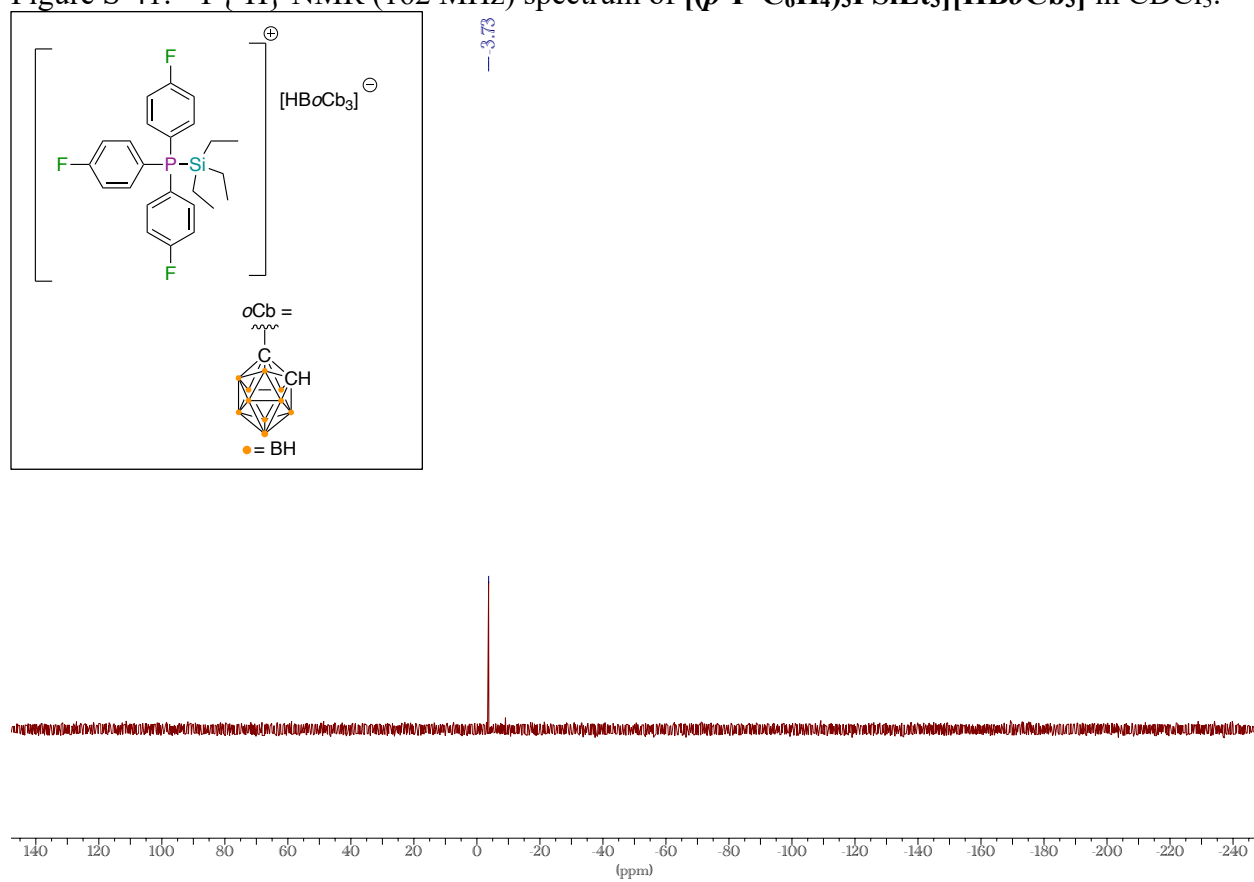

Figure S-42:  $^{19}\text{F}\{^1\text{H}\}$  NMR (376 MHz) spectrum of  $[(p\text{-F-C}_6\text{H}_4)_3\text{PSiEt}_3][\text{HB}o\text{Cb}_3]$  in  $\text{CDCl}_3$ .

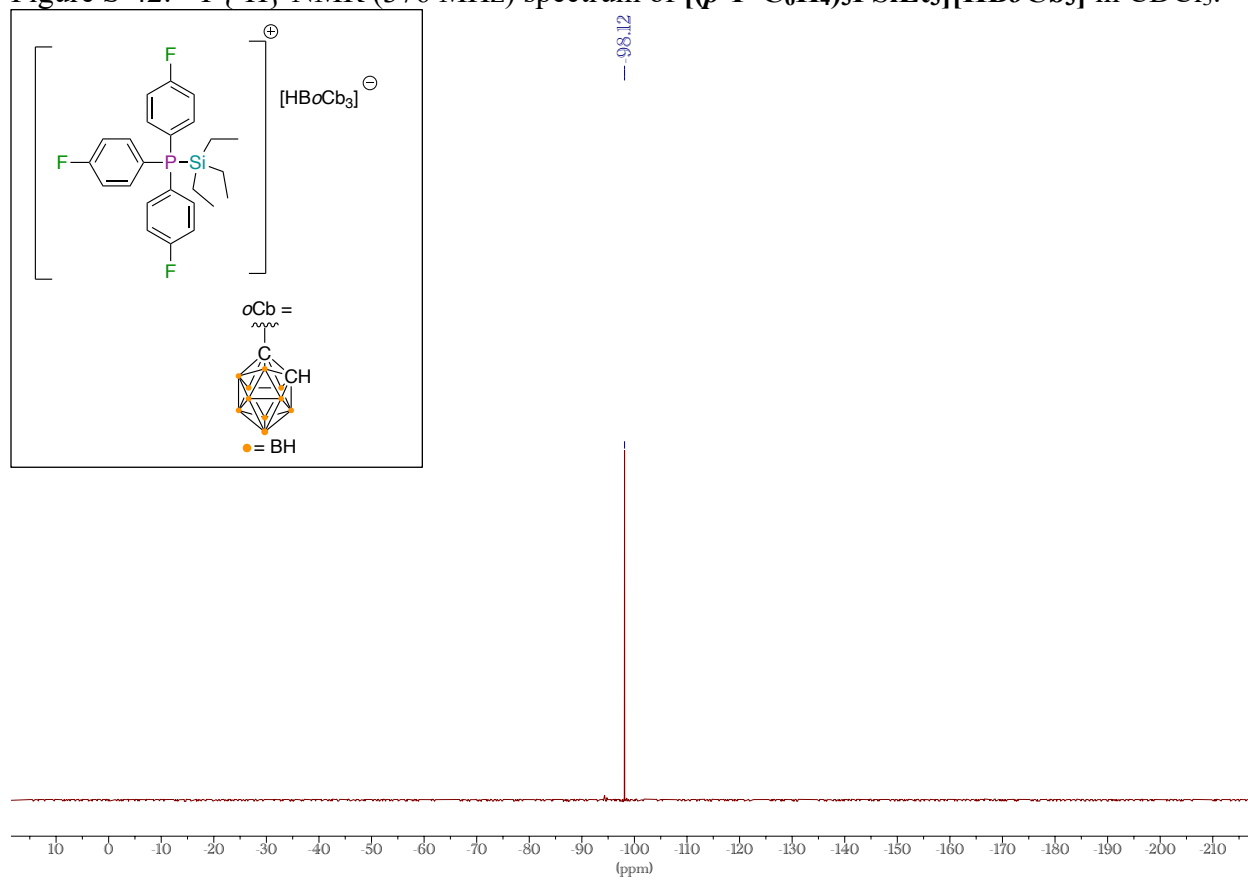

Figure S-43: FT-IR spectrum of  $[(p\text{-F-C}_6\text{H}_4)_3\text{PSiEt}_3][\text{HB}o\text{Cb}_3]$ .

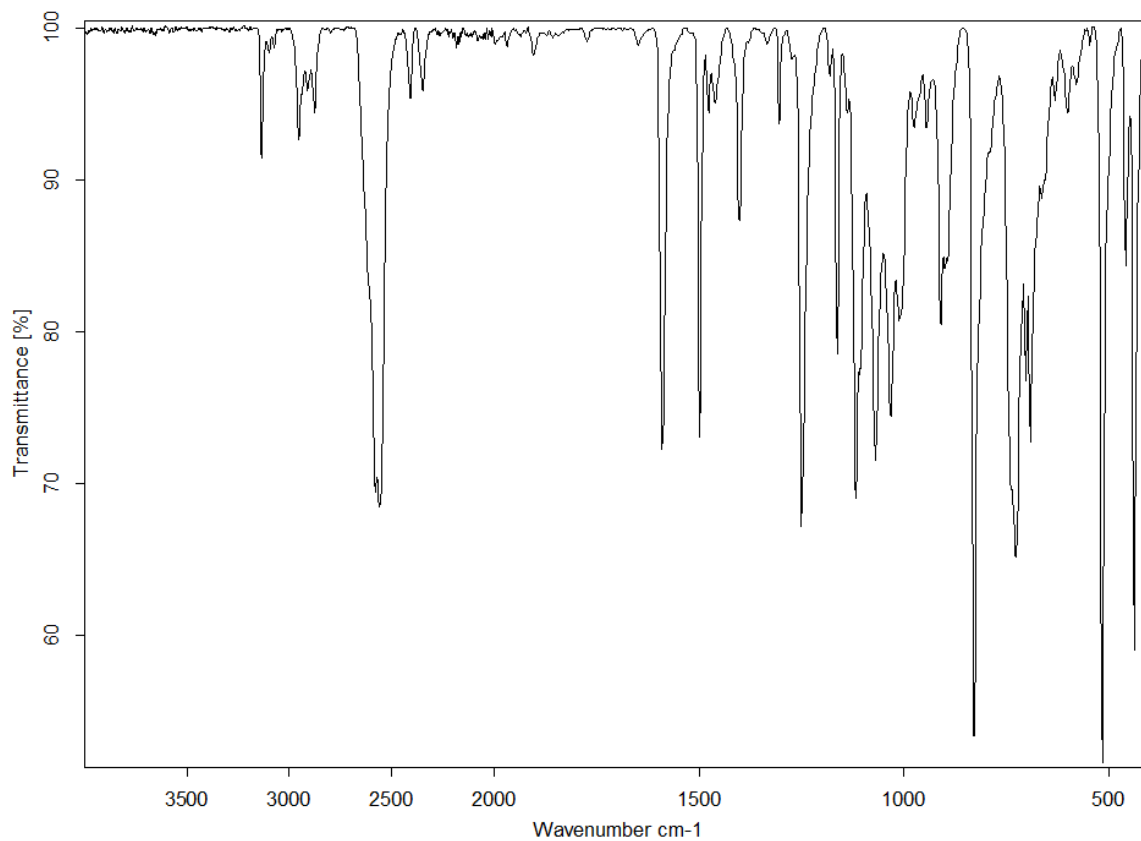

Figure S-44:  $^1\text{H}$  NMR (400 MHz) spectrum of  $[\text{Et}_3\text{NSiEt}_3][\text{HB}\alpha\text{Cb}_3]$  in  $\text{CDCl}_3$  ( $\nabla$  residual triethylamine).

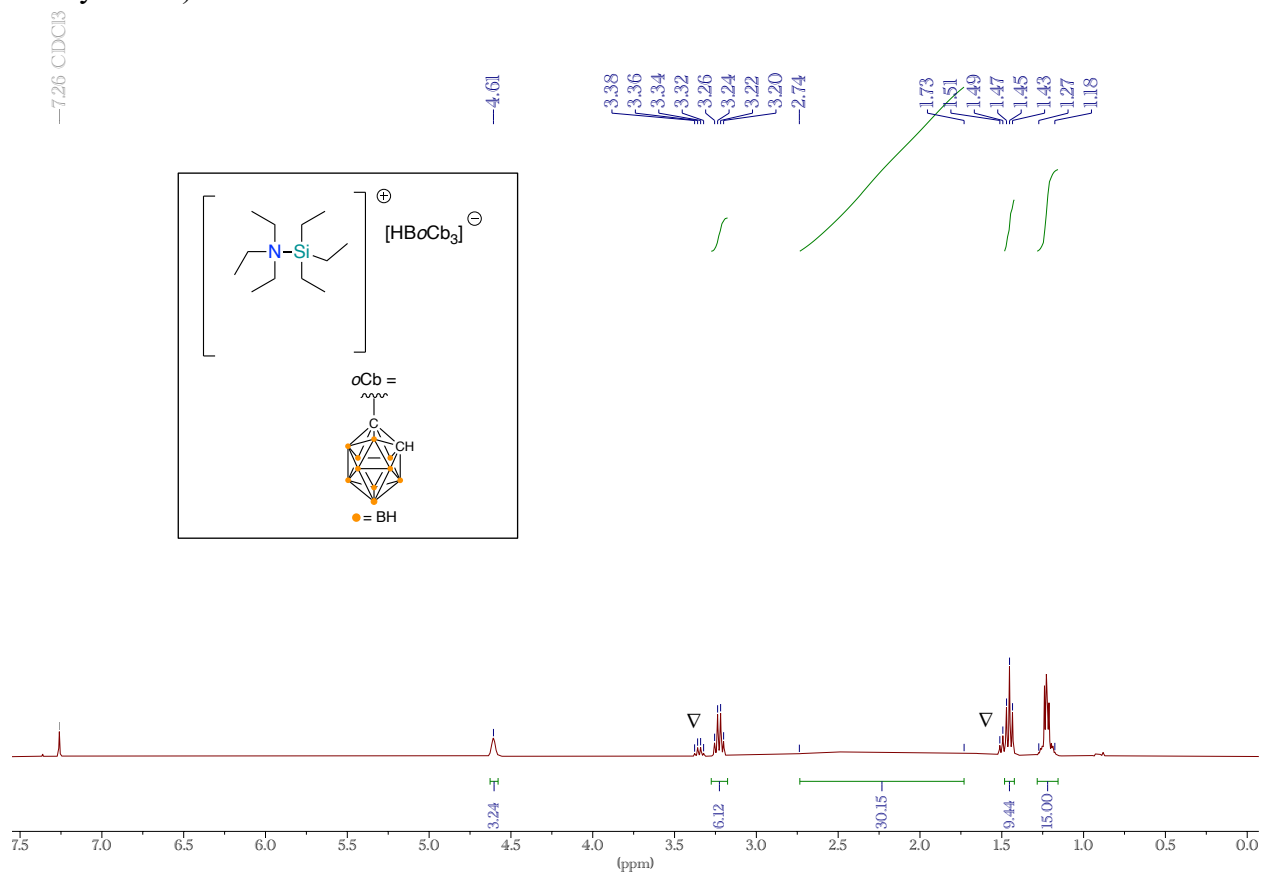

Figure S-45:  $^{13}\text{C}\{^1\text{H}\}$  NMR (101 MHz) spectrum of  $[\text{Et}_3\text{NSiEt}_3][\text{HB}o\text{Cb}_3]$  in  $\text{CDCl}_3$ .

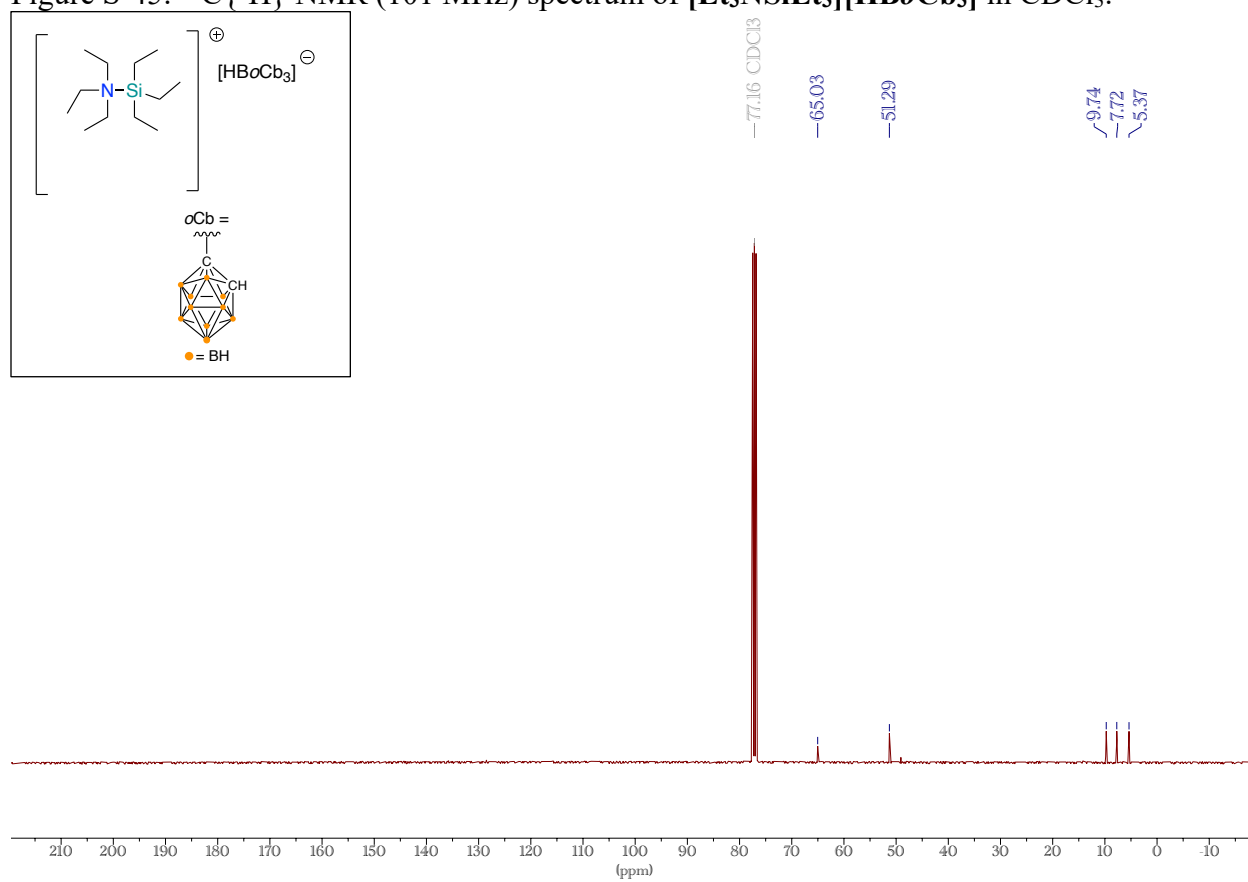

Figure S-46:  $^{11}\text{B}\{^1\text{H}\}$  NMR (128 MHz) spectrum of  $[\text{Et}_3\text{NSiEt}_3][\text{HB}o\text{Cb}_3]$  in  $\text{CDCl}_3$ .

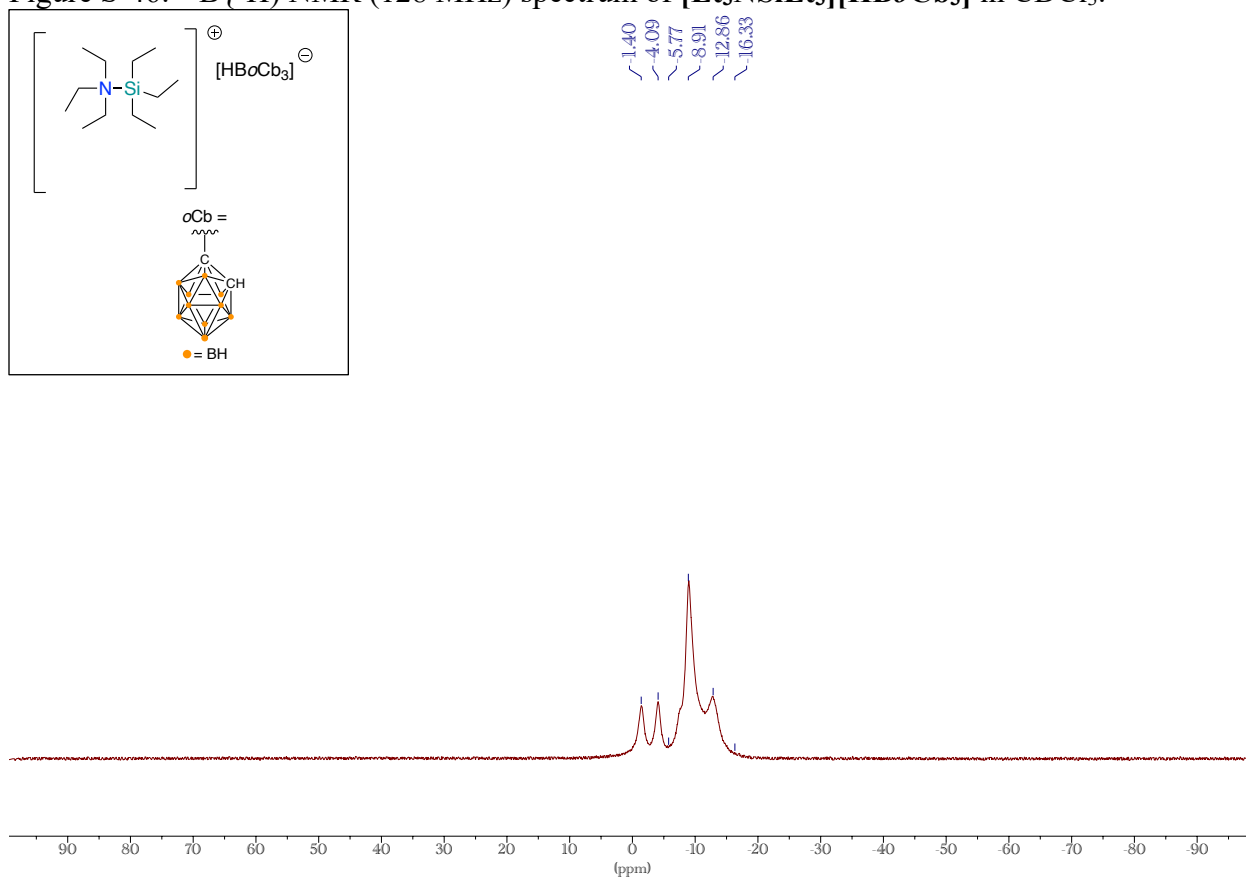



Figure S-47:  $^{11}\text{B}$  NMR (128 MHz) spectrum of  $[\text{Et}_3\text{NSiEt}_3][\text{HB}o\text{Cb}_3]$  in  $\text{CDCl}_3$ .

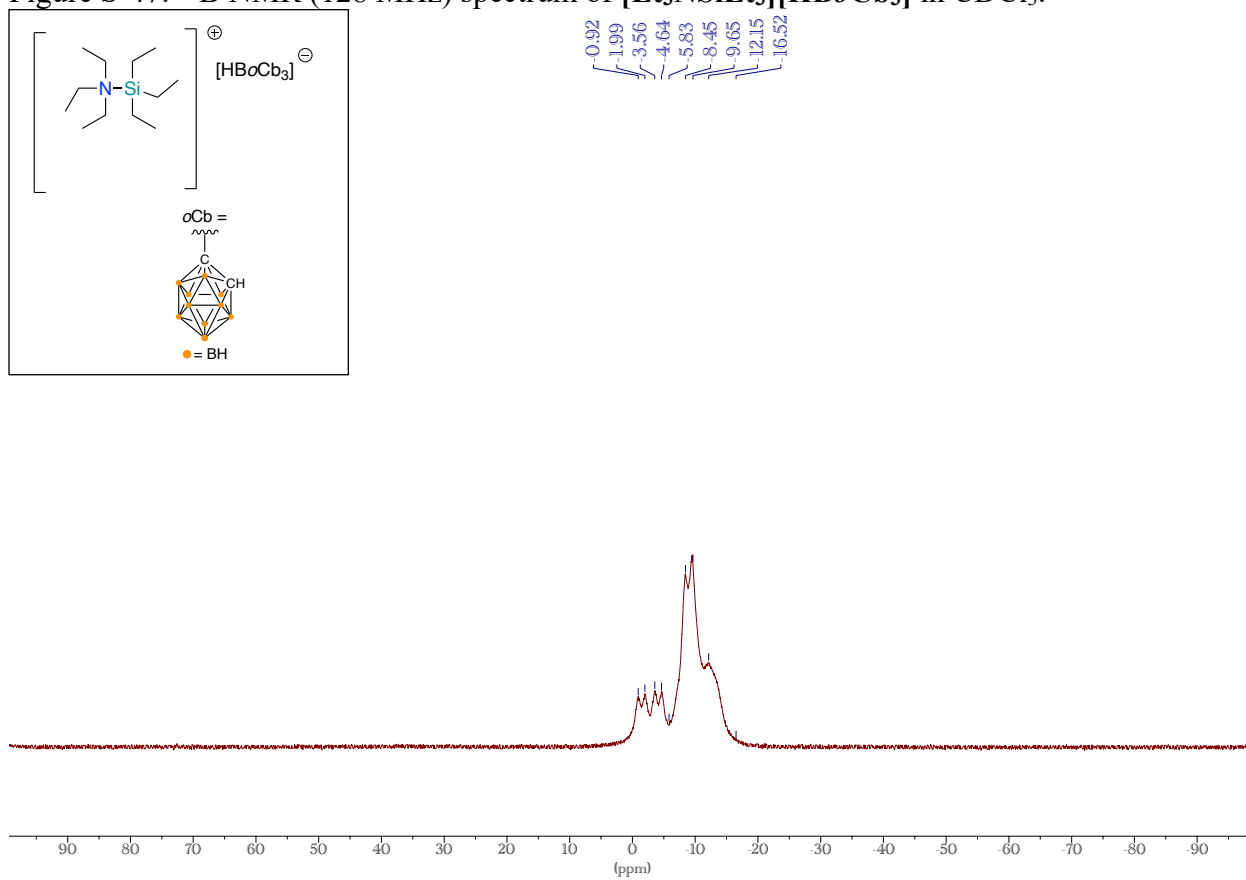

Figure S-48: FT-IR spectrum of  $[\text{Et}_3\text{NSiEt}_3][\text{HB}o\text{Cb}_3]$ .

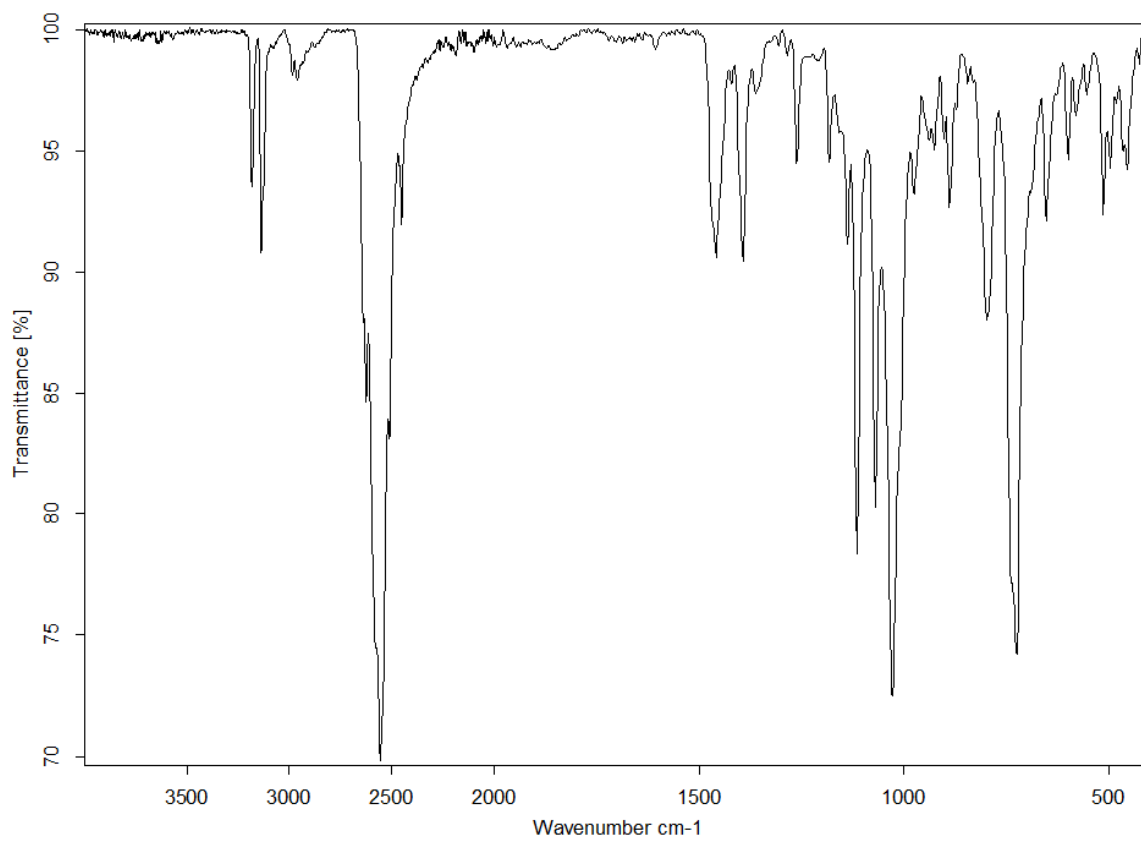

Figure S-49:  $^{19}\text{F}\{^1\text{H}\}$  NMR (376 MHz) spectrum obtained from the combination of  $[\text{HB}o\text{Cb}_3]$   $[\text{Ph}_3\text{PSiEt}_3]$  and  $\text{B}(\text{C}_6\text{F}_5)_3$  in  $\text{CDCl}_3$ . (\* Corresponds to free  $\text{B}(\text{C}_6\text{F}_5)_3$ ).

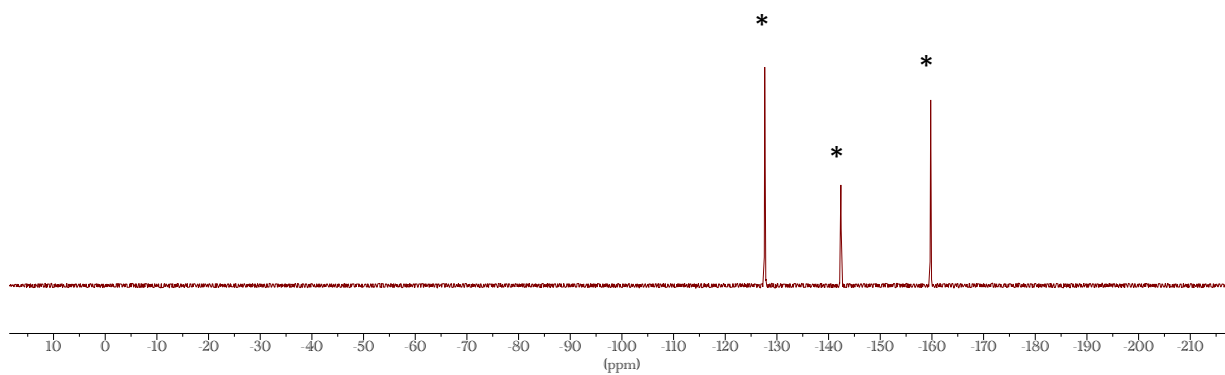

Figure S-50:  $^{11}\text{B}$  NMR (128 MHz) spectrum obtained from the combination of  $[\text{HB}o\text{Cb}_3]$   $[\text{Ph}_3\text{PSiEt}_3]$  and  $\text{B}(\text{C}_6\text{F}_5)_3$  in  $\text{CDCl}_3$ .

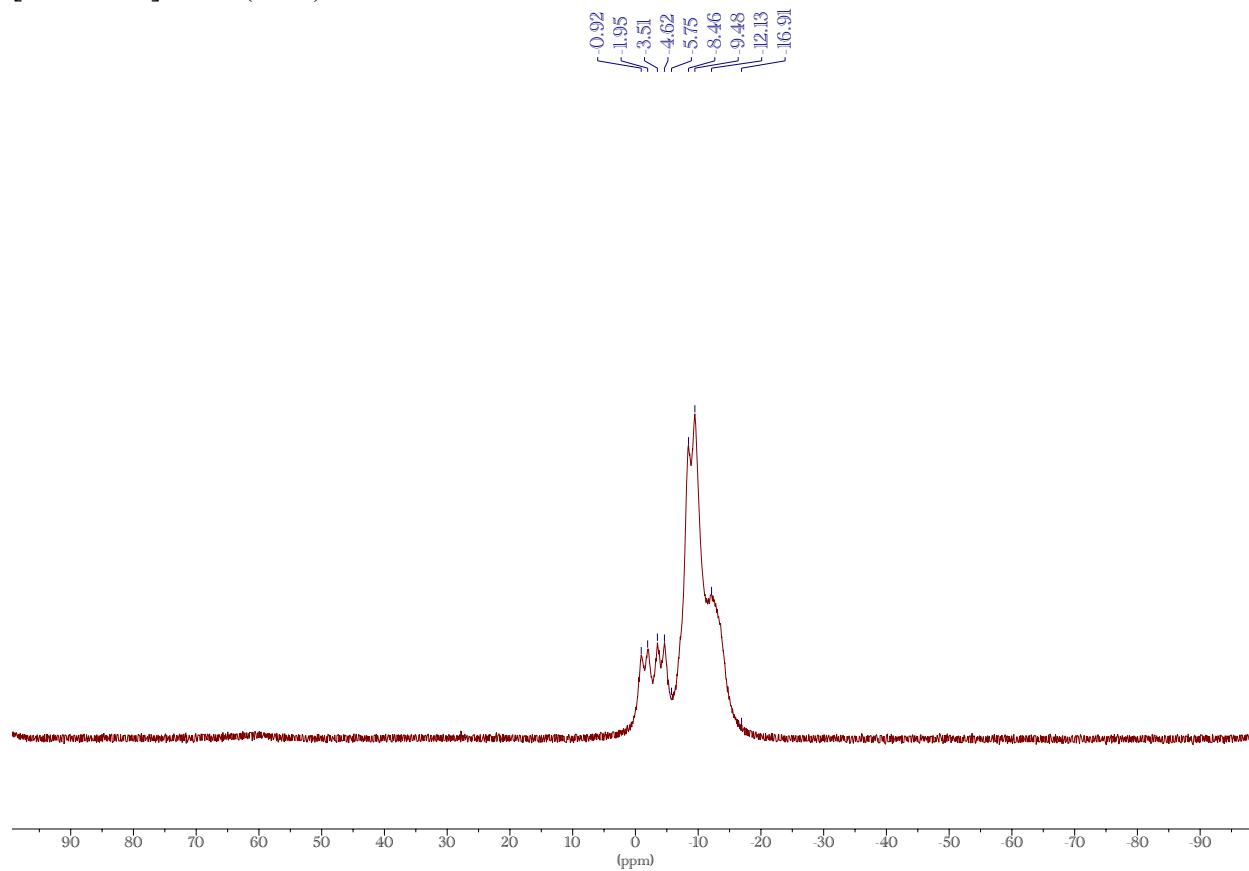

Figure S-51: Stacked  $^{11}\text{B}$  NMR (128 MHz) spectrum obtained from the combination of  $[\text{NEt}_4][\text{HB}(\text{C}_6\text{F}_5)_3]$  and  $\text{B}o\text{Cb}_3$  in  $\text{CDCl}_3$  at  $23\text{ }^\circ\text{C}$ . (● corresponds to the central boron of  $\text{B}o\text{Cb}_3$ , ● to the BH cluster of  $\text{B}o\text{Cb}_3$ , and ● corresponds to the central BH in  $[\text{HB}(\text{C}_6\text{F}_5)_3]$ ).

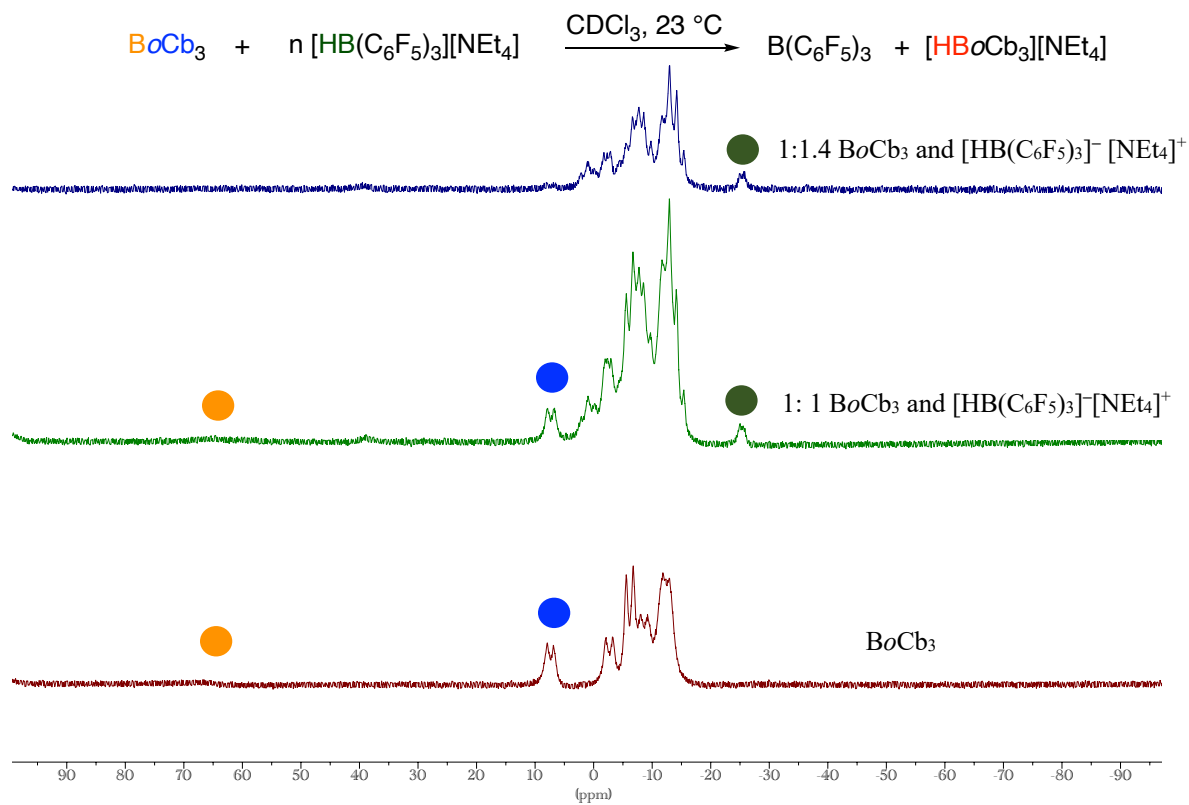

Table S-1: X-ray crystallographic details.

| Compound                             | EtOAc·B <sub>o</sub> Cb <sub>3</sub>                           | 2,6-<br>(CH <sub>3</sub> ) <sub>2</sub> C <sub>6</sub> H <sub>3</sub> NC·B <sub>o</sub> Cb <sub>3</sub> | [Me <sub>3</sub> PSiEt <sub>3</sub> ][HB <sub>o</sub> Cb <sub>3</sub> ] | [Ph <sub>3</sub> PSiEt <sub>3</sub> ][HB <sub>o</sub> Cb <sub>3</sub> ] |
|--------------------------------------|----------------------------------------------------------------|---------------------------------------------------------------------------------------------------------|-------------------------------------------------------------------------|-------------------------------------------------------------------------|
| CCDC                                 | 2259756                                                        | 2259757                                                                                                 | 2259758                                                                 | 2259759                                                                 |
| Empirical Formula                    | C <sub>10</sub> H <sub>41</sub> O <sub>2</sub> B <sub>31</sub> | C <sub>15</sub> H <sub>42</sub> NB <sub>31</sub>                                                        | C <sub>15</sub> H <sub>58</sub> B <sub>31</sub> PSi                     | C <sub>30</sub> H <sub>64</sub> B <sub>31</sub> PSi                     |
| FW (g/mol)                           | 528.54                                                         | 571.60                                                                                                  | 632.78                                                                  | 818.98                                                                  |
| Crystal System                       | triclinic                                                      | triclinic                                                                                               | trigonal                                                                | trigonal                                                                |
| Space Group                          | <i>P</i> -1                                                    | <i>P</i> -1                                                                                             | <i>P</i> -3C <sub>1</sub>                                               | <i>R</i> -3                                                             |
| a (Å)                                | 10.5389(9)                                                     | 11.0762(5)                                                                                              | 13.0069(3)                                                              | 15.5559(7)                                                              |
| b (Å)                                | 12.0167(10)                                                    | 12.7163(5)                                                                                              | 13.0069(3)                                                              | 15.5559(7)                                                              |
| c (Å)                                | 13.0713(9)                                                     | 12.9783(5)                                                                                              | 25.8322(8)                                                              | 36.209(3)                                                               |
| α (deg)                              | 67.038(3)                                                      | 87.269(2)                                                                                               | 90                                                                      | 90                                                                      |
| β (deg)                              | 81.962(3)                                                      | 66.922(2)                                                                                               | 90                                                                      | 90                                                                      |
| γ (deg)                              | 87.400(3)                                                      | 78.596(2)                                                                                               | 120                                                                     | 120                                                                     |
| V (Å <sup>3</sup> )                  | 1509.2(2)                                                      | 1647.58(12)                                                                                             | 3784.8(2)                                                               | 7588.2(9)                                                               |
| Z                                    | 2                                                              | 2                                                                                                       | 4                                                                       | 6                                                                       |
| D <sub>c</sub> (g cm <sup>-3</sup> ) | 1.163                                                          | 1.152                                                                                                   | 1.111                                                                   | 1.075                                                                   |
| Radiation λ (Å)                      | 0.71073                                                        | 0.71073                                                                                                 | 0.71073                                                                 | 0.71073                                                                 |
| Temp                                 | 150 K                                                          | 150 K                                                                                                   | 150 K                                                                   | 150 K                                                                   |
| R1 [I > 2(σ)I] <sup>a</sup>          | 0.0417                                                         | 0.0407                                                                                                  | 0.0550                                                                  | 0.0677                                                                  |
| wR2 (F <sup>2</sup> ) <sup>a</sup>   | 0.1067                                                         | 0.1080                                                                                                  | 0.1373                                                                  | 0.1691                                                                  |
| GOF (S) <sup>a</sup>                 | 1.097                                                          | 1.049                                                                                                   | 1.154                                                                   | 1.116                                                                   |

<sup>a</sup>  $R1(F[I > 2(I)]) = \sum ||F_o| - |F_c|| / \sum |F_o|$ ;  $wR2(F^2 [\text{all data}]) = \{[w(F_o^2 - F_c^2)^2] / [w(F_o^2)^2]\}^{1/2}$ ;  $S(\text{all data}) = [w(F_o^2 - F_c^2)^2 / (n - p)]^{1/2}$  ( $n$  = no. of data;  $p$  = no. of parameters varied;  $w = 1/\sigma^2(F_o^2) + (aP)^2 + bP$ ) where  $P = (F_o^2 + 2F_c^2)/3$  and  $a$  and  $b$  are constants suggested by the refinement program.
